# Supplementary material for: Design, synthesis and in vitro evaluations of new cyclotriphosphazenes as safe drug candidates
Source: Royal Society of Chemistry journal article supplement (doi:10.1039/d4md00885e), 2025-01-01
Supplement: d4md00885e1.pdf [file d4md00885e1.pdf]

## **Design, synthesis and in vitro evaluations of new cyclotriphosphazenes as safe drug candidates**

Elif Yıldız Gül<sup>a,\*\*</sup>, Büşra Tiryaki<sup>b,\*\*</sup>, Buse Köse<sup>a</sup>, Nuri Öztürk<sup>b</sup>, Elif Okutan<sup>c</sup>, Burcu Dedeoğlu<sup>c</sup>, Esra Tanrıverdi Eçik<sup>a,\*</sup>

<sup>a</sup> Department of Chemistry, Faculty of Science, Atatürk University, Erzurum, Türkiye

<sup>b</sup> Department of Molecular Biology and Genetics, Gebze Technical University, Kocaeli, Türkiye

<sup>c</sup> Department of Chemistry, Gebze Technical University, Kocaeli, Türkiye

\*Department of Chemistry, Faculty of Science, Atatürk University, Erzurum, Türkiye

*E-mail:* [esra.ecik@atauni.edu.tr](mailto:esra.ecik@atauni.edu.tr) ([E. Tanrıverdi-Eçik](#))

\*\*E. Yıldız-Gül and B. Tiryaki equally contributed to this manuscript.

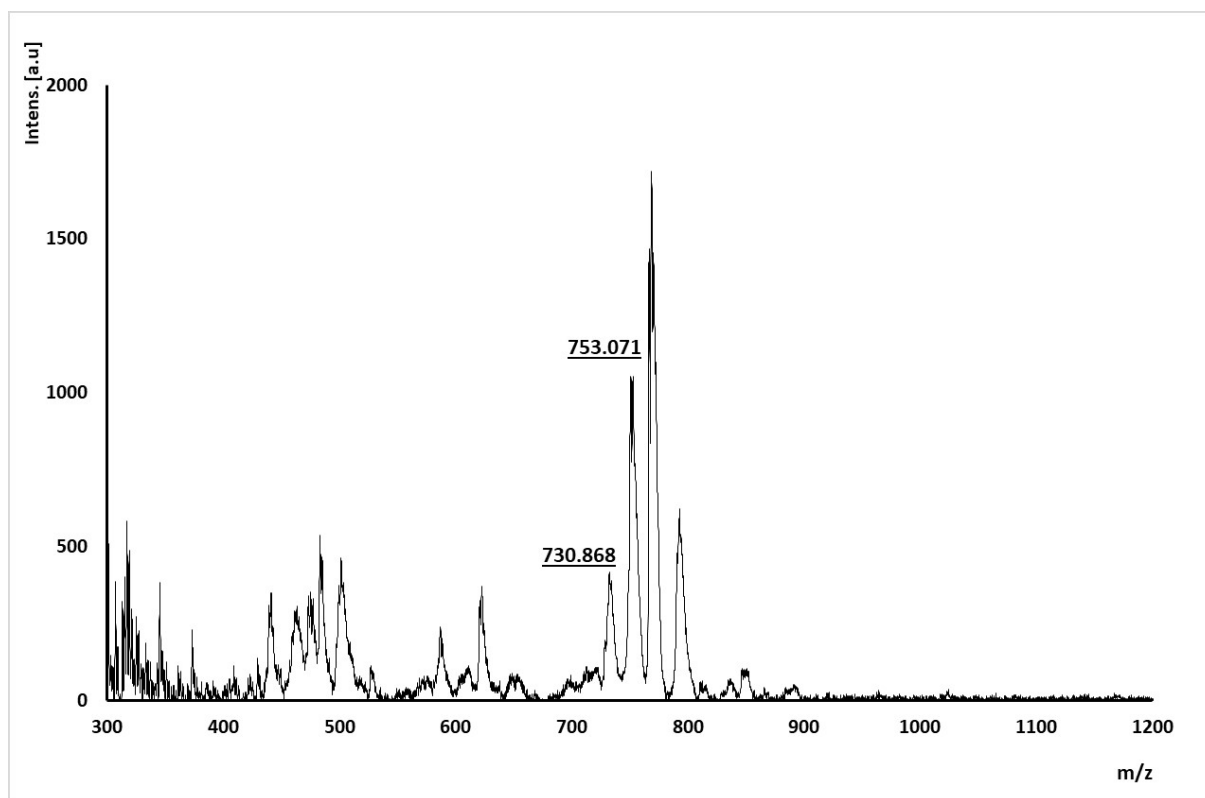

**Fig S1.** The MALDI TOF mass spectrum of compound **1**

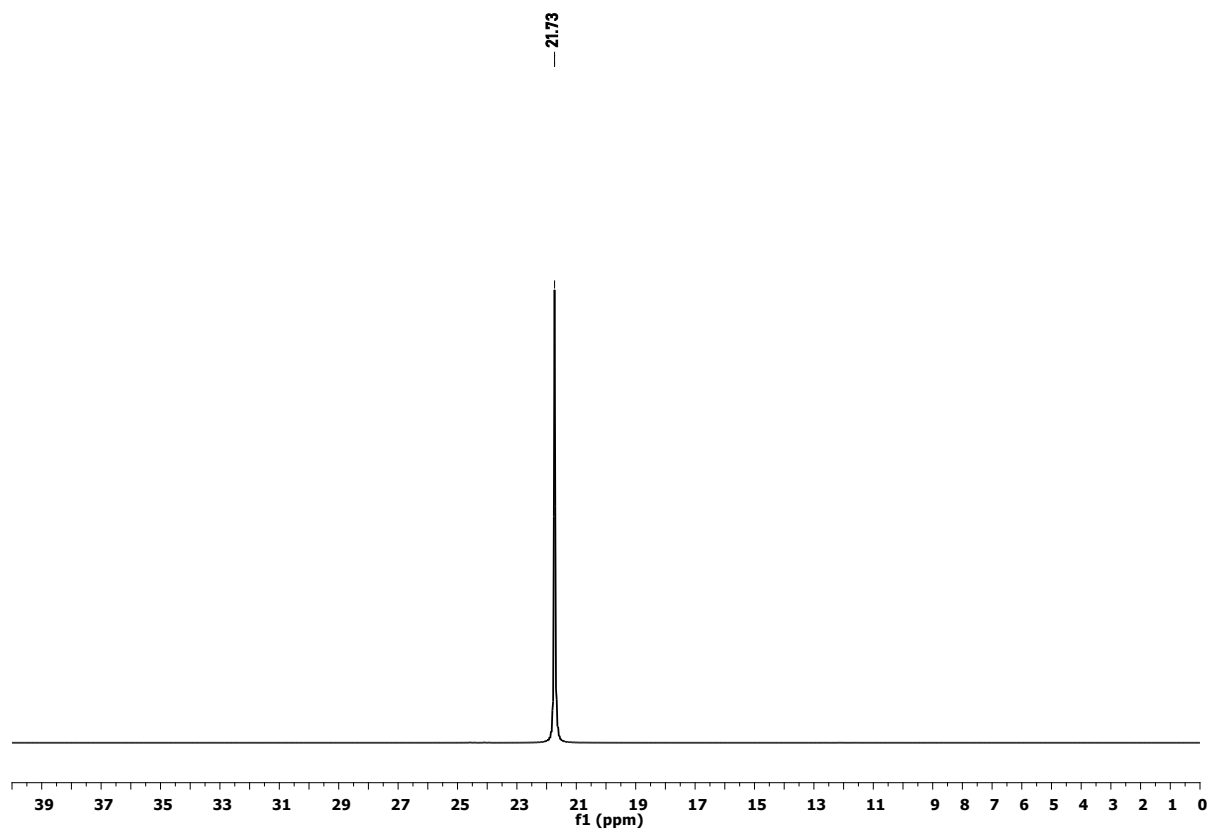

**Fig S2.** The proton decoupled  $^{31}\text{P}$  NMR spectrum of compound **1**

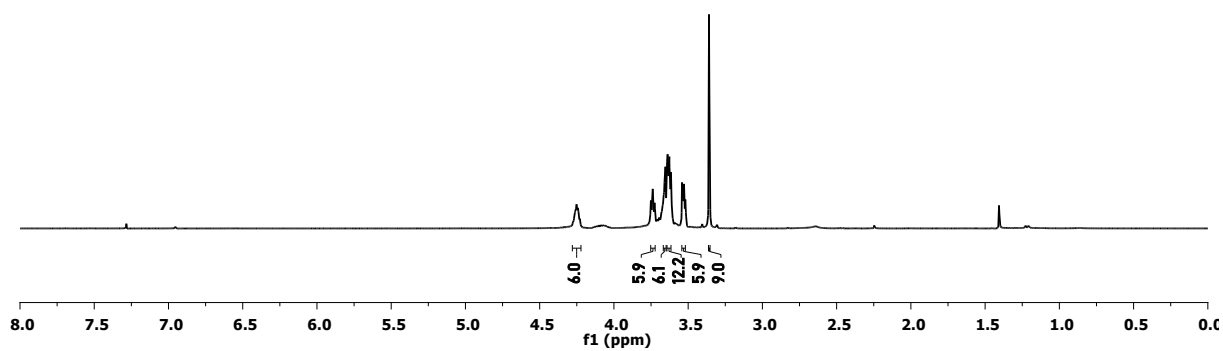

**Fig S3.** The  $^1\text{H}$  NMR spectrum of compound **1**

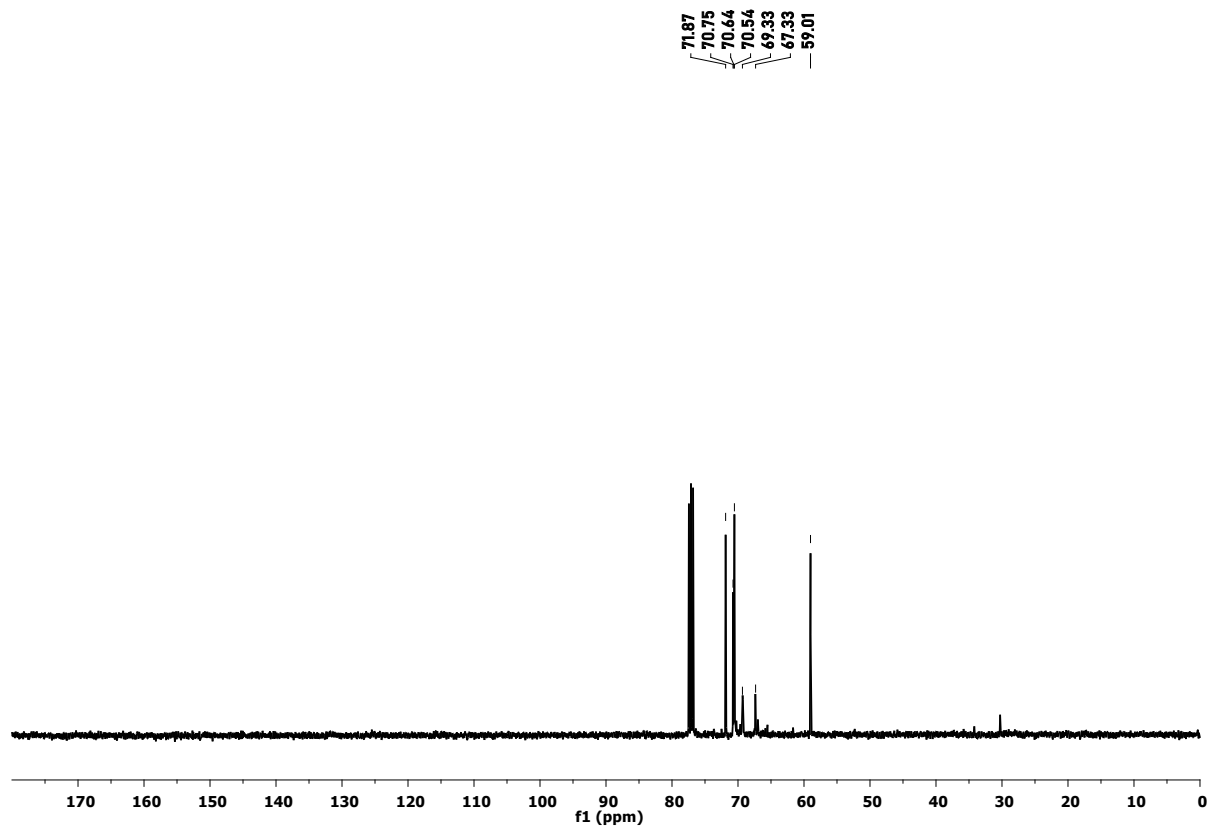

**Fig S4.** The  $^{13}\text{C}$  NMR spectrum of compound **1**

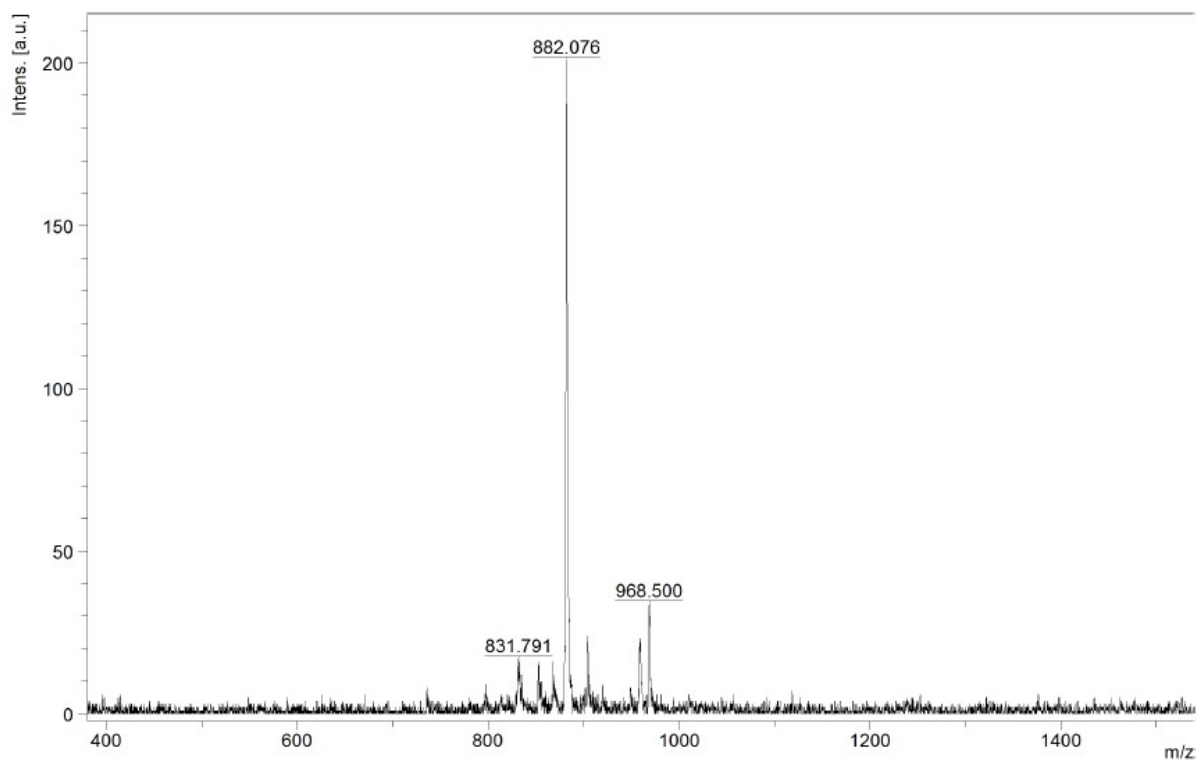

**Fig S5.** The MALDI TOF mass spectrum of compound **2**

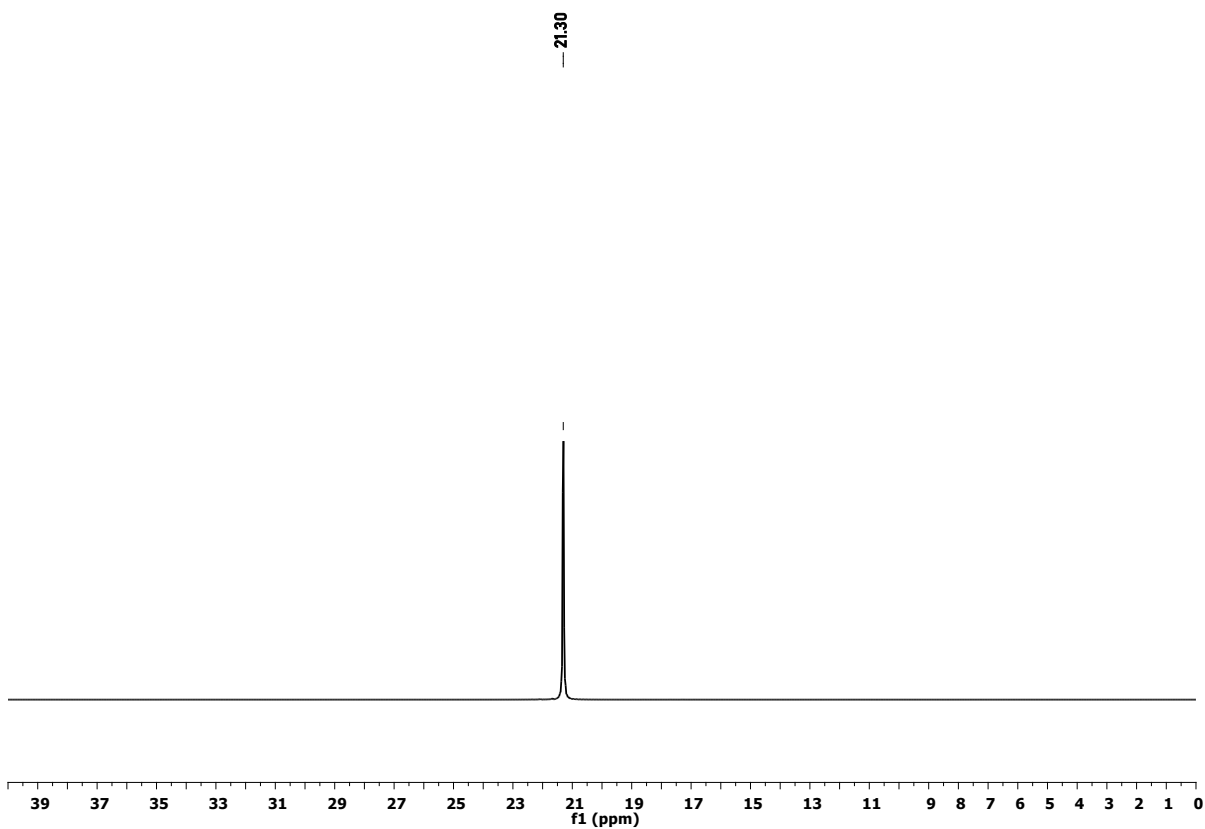

**Fig S6.** The proton decoupled  $^{31}\text{P}$  NMR spectrum of compound **2**

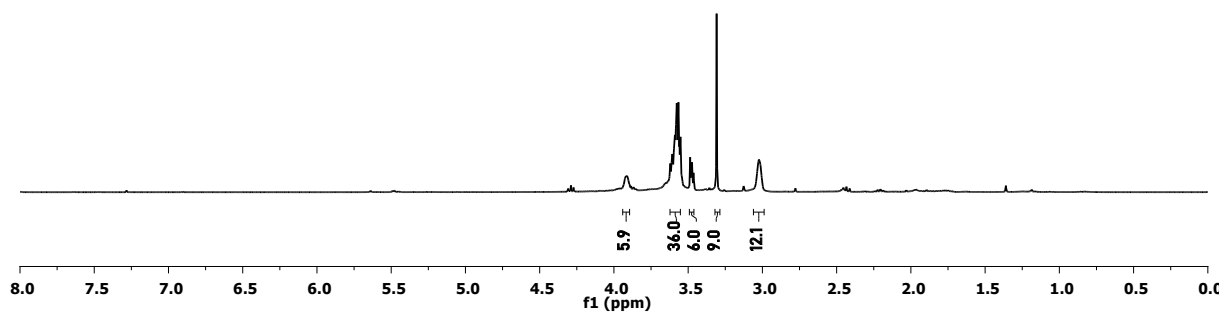

**Fig S7.** The <sup>1</sup>H NMR spectrum of compound 2

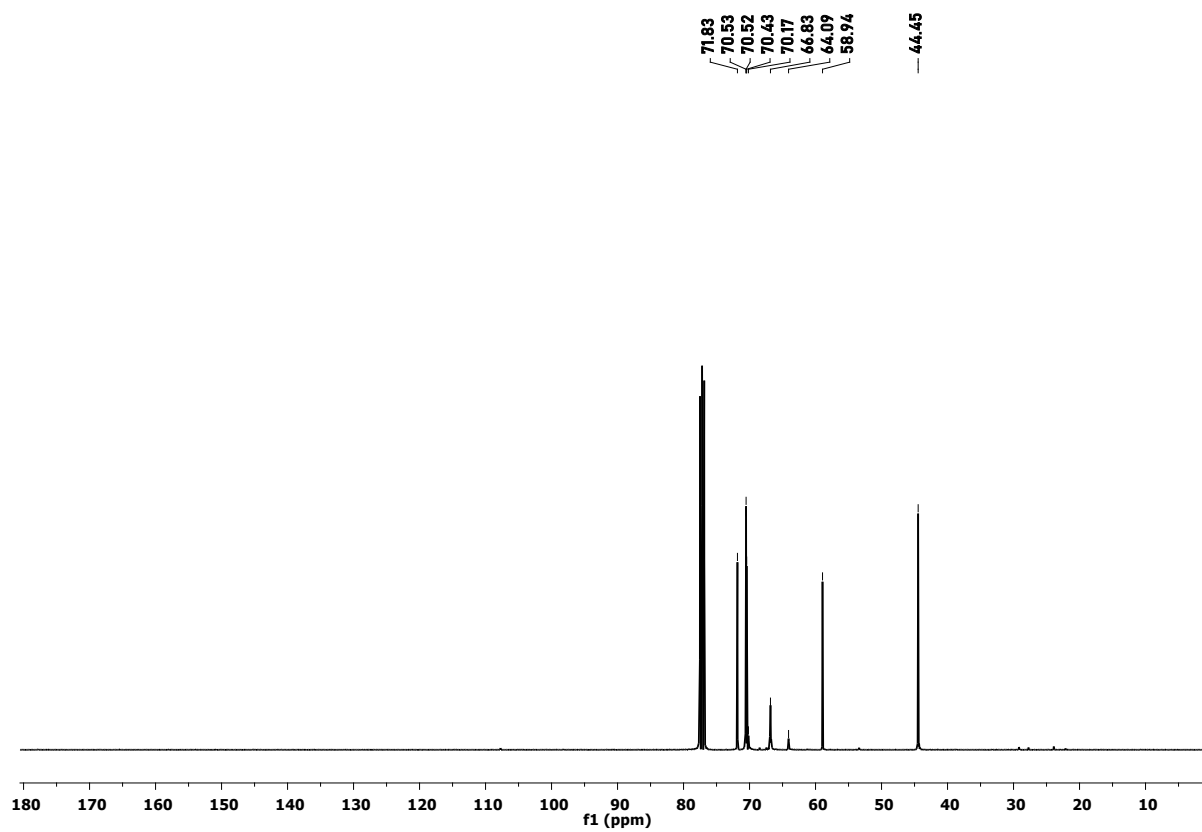

**Fig S8.** The <sup>13</sup>C NMR spectrum of compound 2

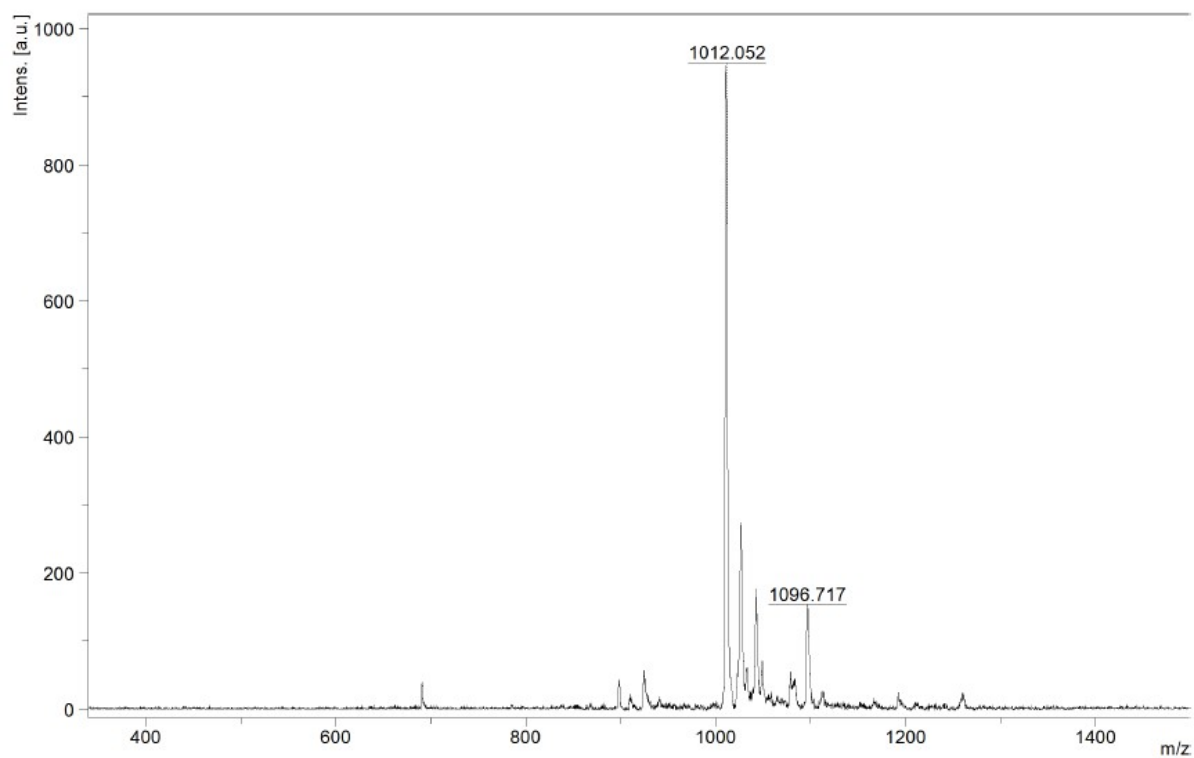

**Fig S9.** The MALDI TOF mass spectrum of compound **3**

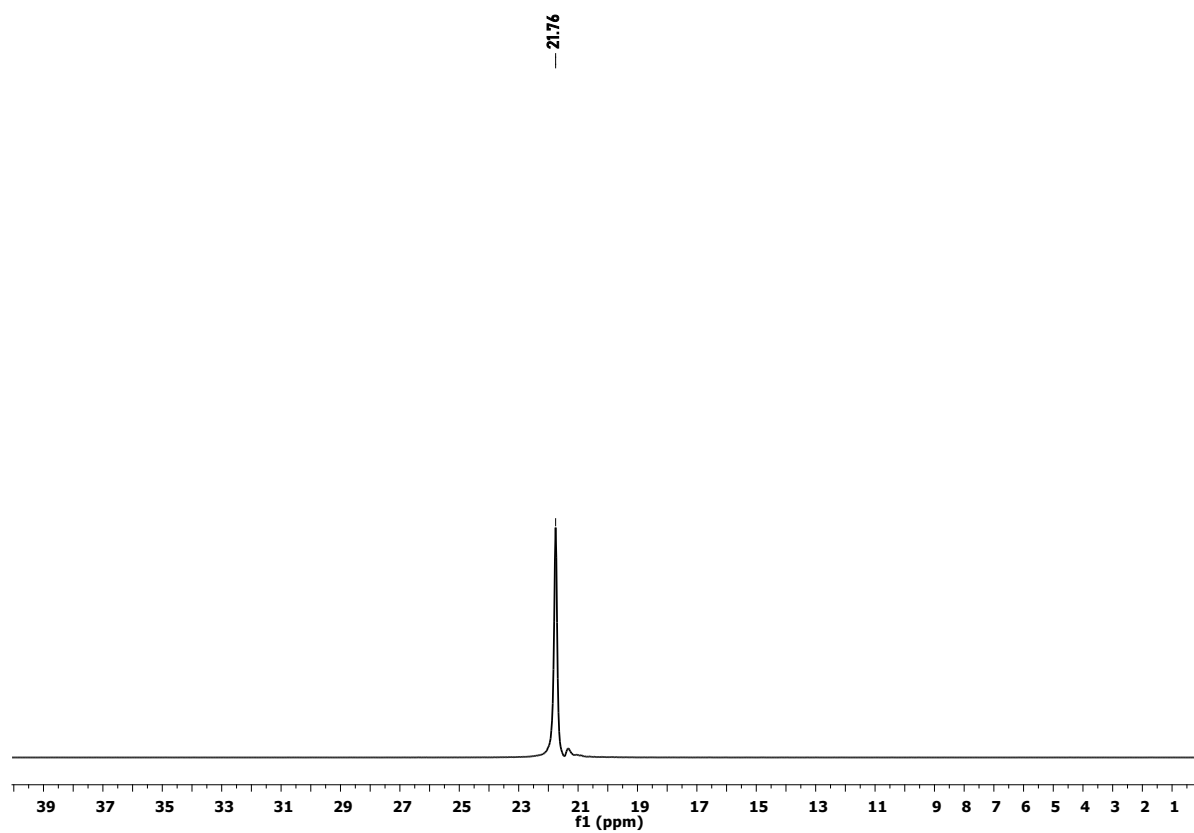

**Fig S10.** The proton decoupled <sup>31</sup>P NMR spectrum of compound **3**

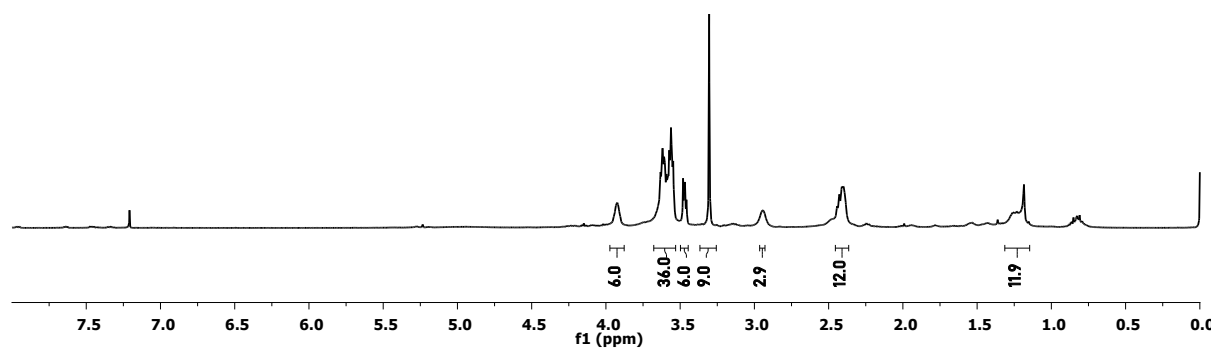

Fig S11. The <sup>1</sup>H NMR spectrum of compound 3

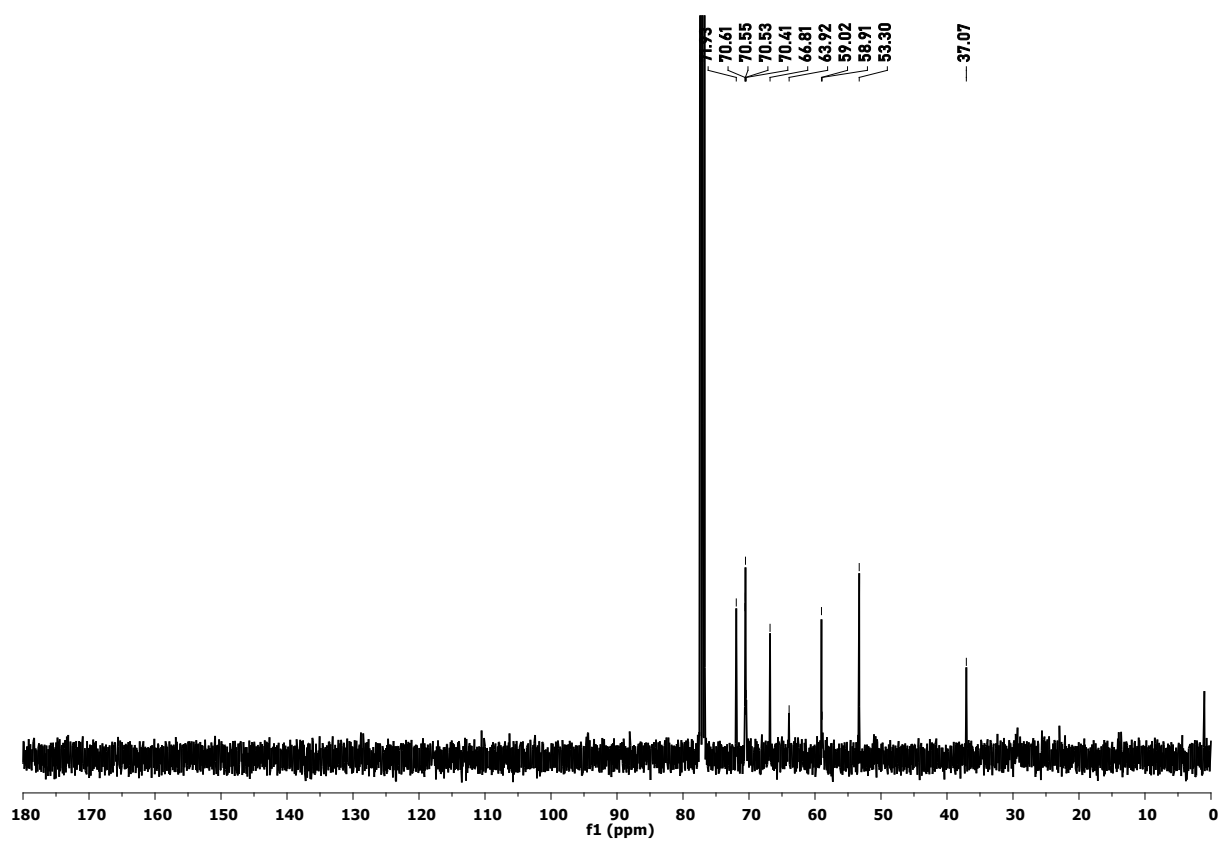

Fig S12. The <sup>13</sup>C NMR spectrum of compound 3

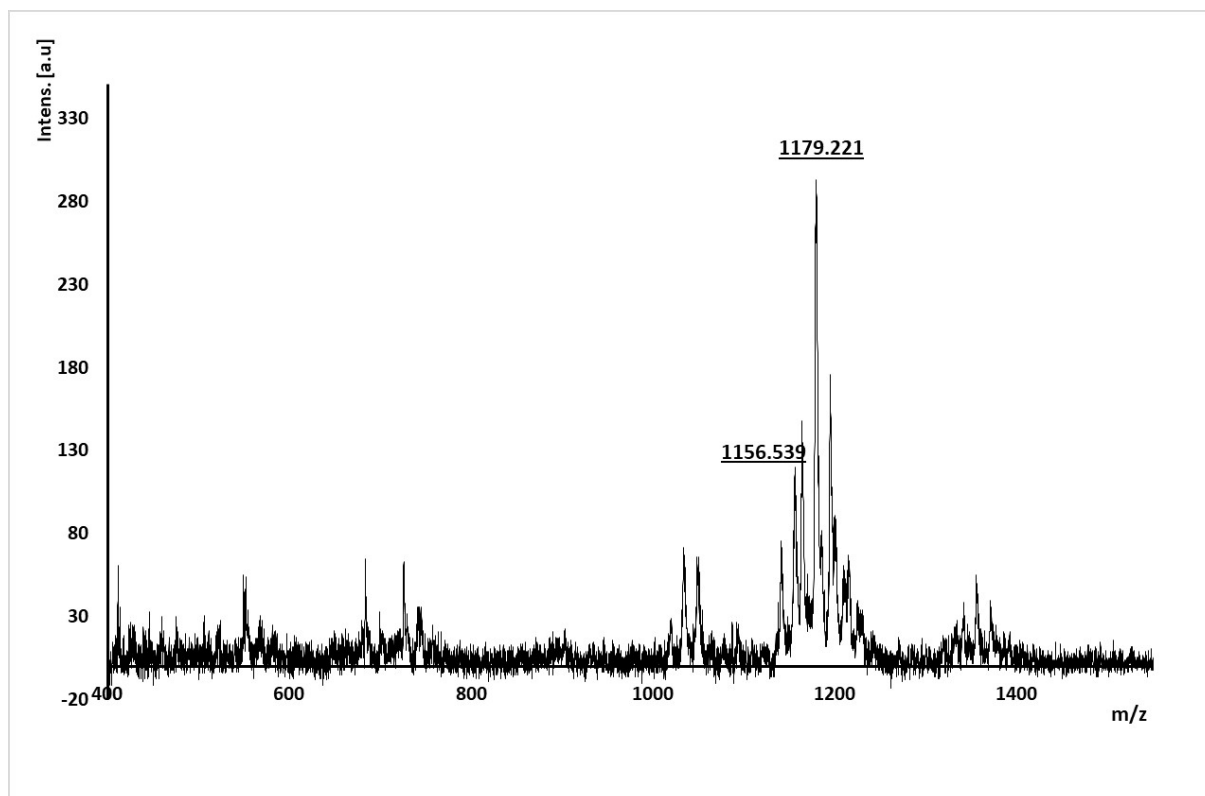

**Fig S13.** The MALDI TOF mass spectrum of compound **4**

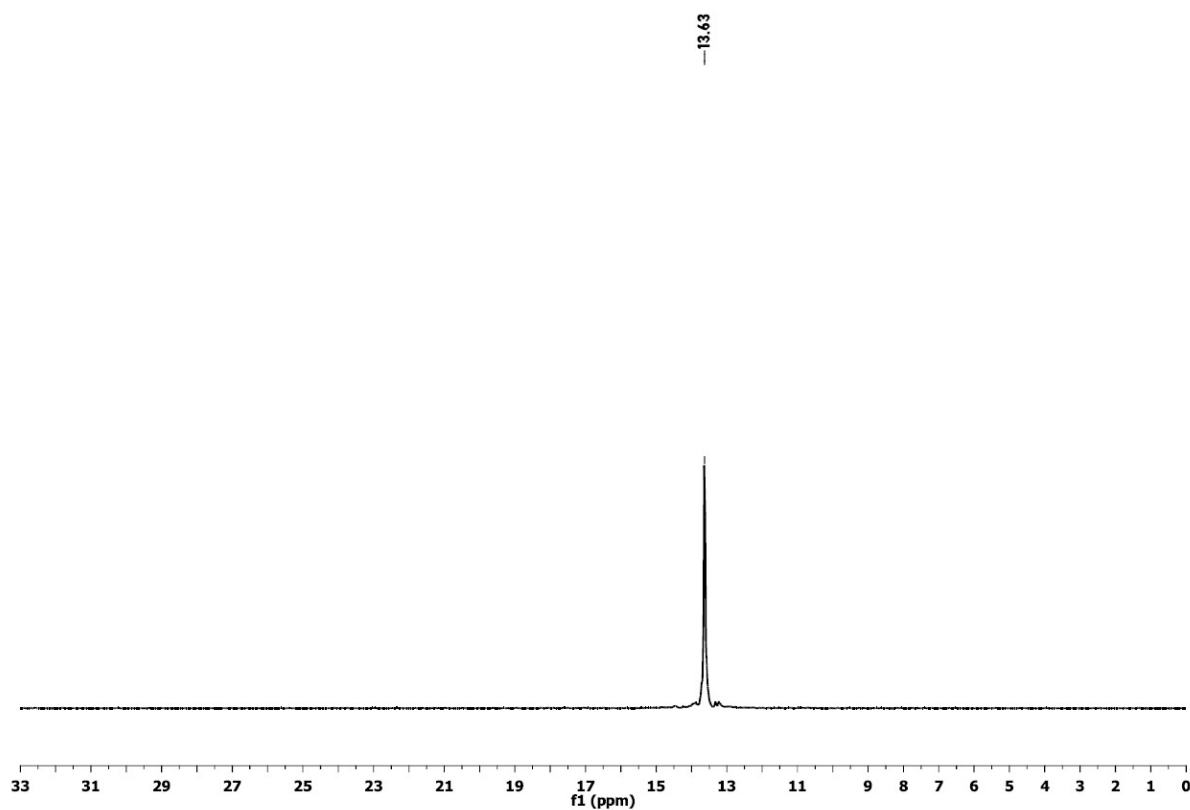

**Fig S14.** The proton decoupled  $^{31}\text{P}$  NMR spectrum of compound **4**



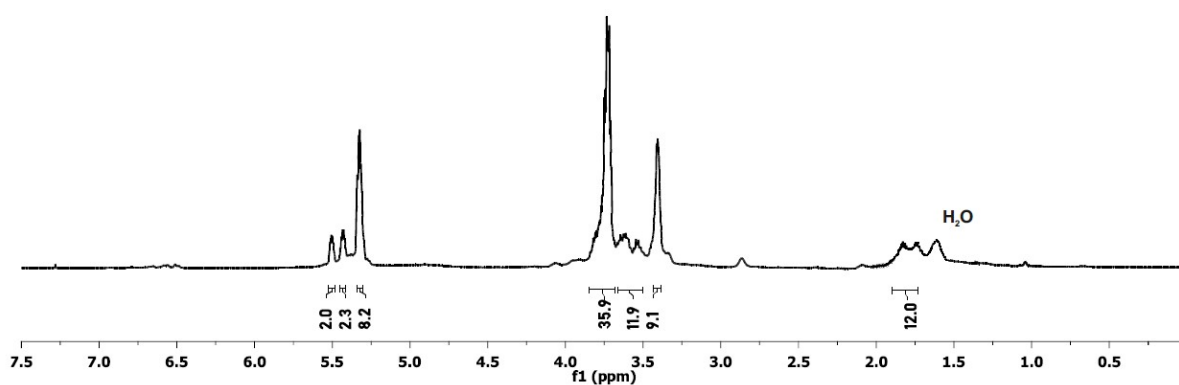

Fig S15. The <sup>1</sup>H NMR spectrum of compound 4

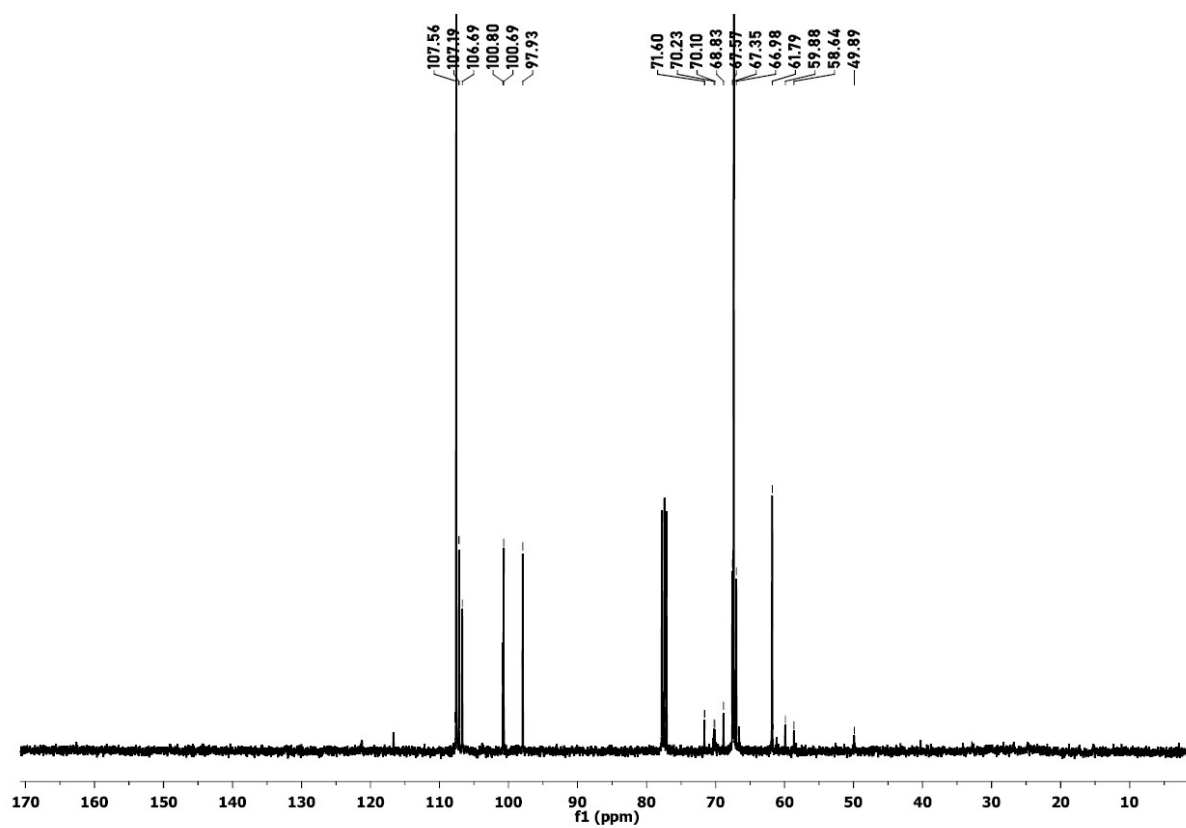

Fig S16. The <sup>13</sup>C NMR spectrum of compound 4

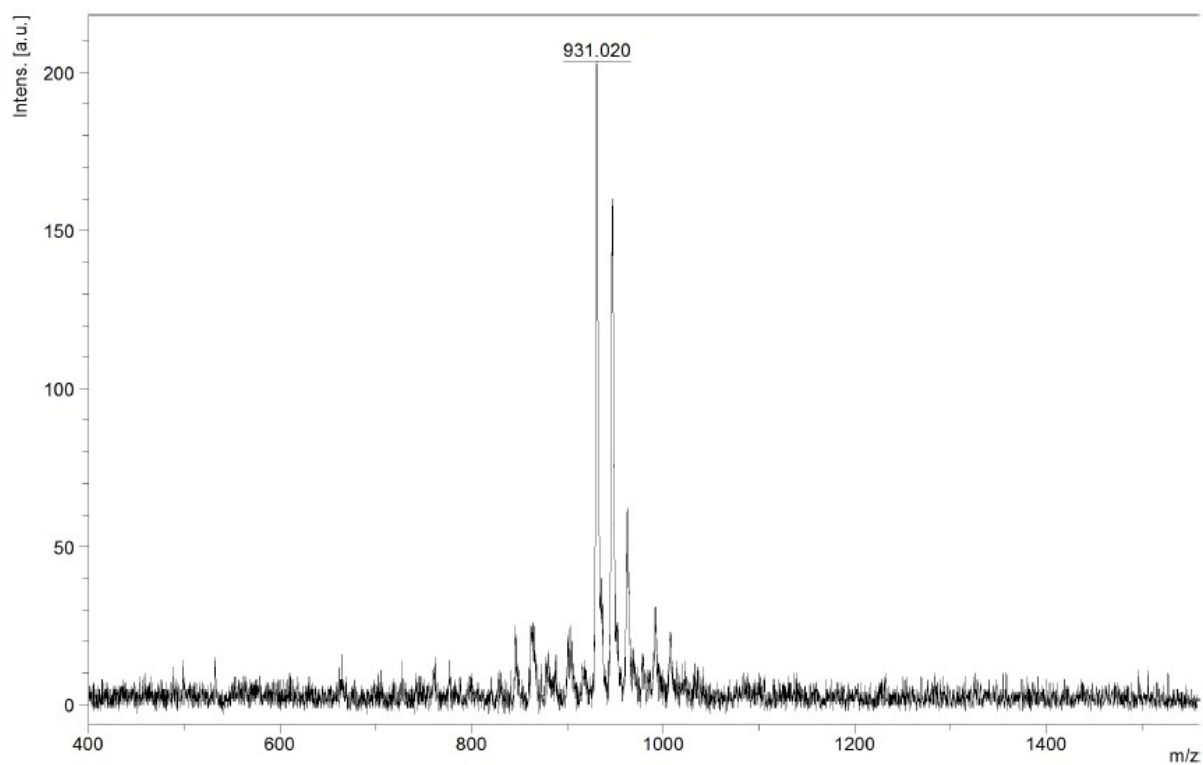

**Fig S17.** The MALDI TOF mass spectrum of compound **5**

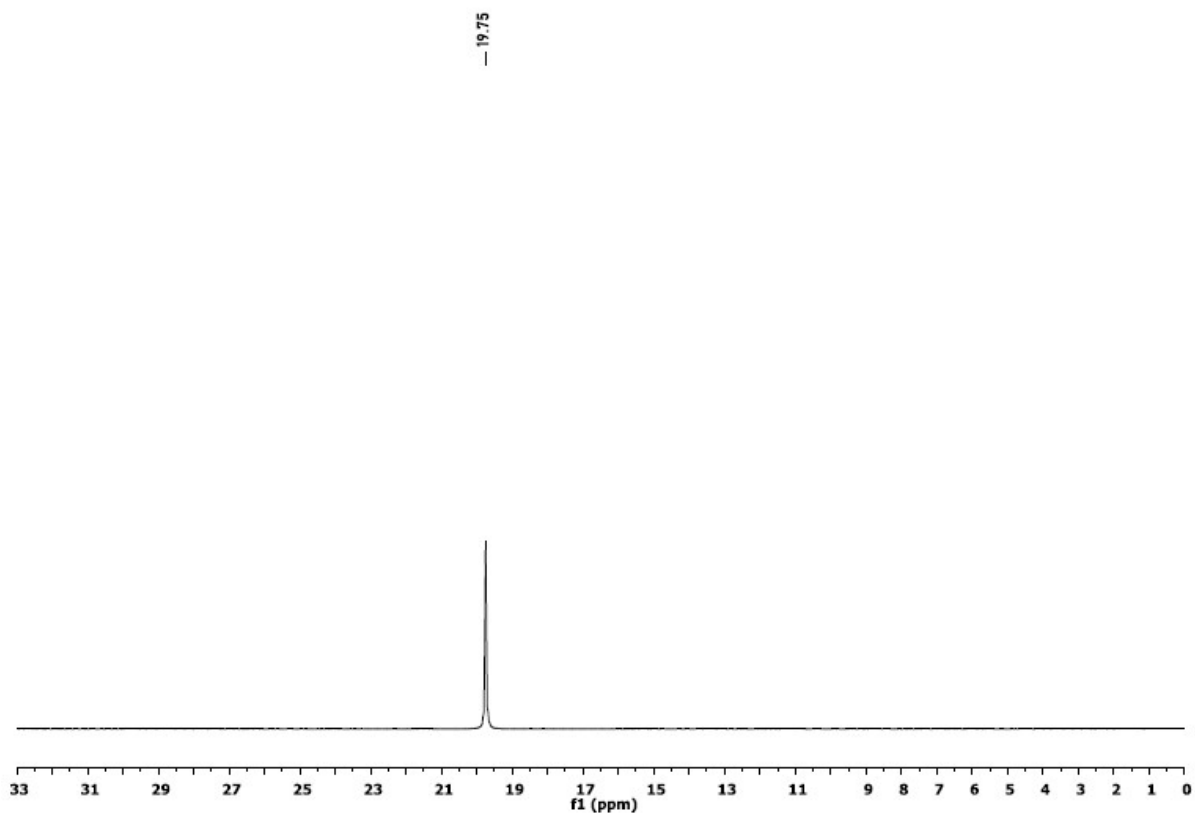

**Fig S18.** The proton decoupled  $^{31}\text{P}$  NMR spectrum of compound **5**

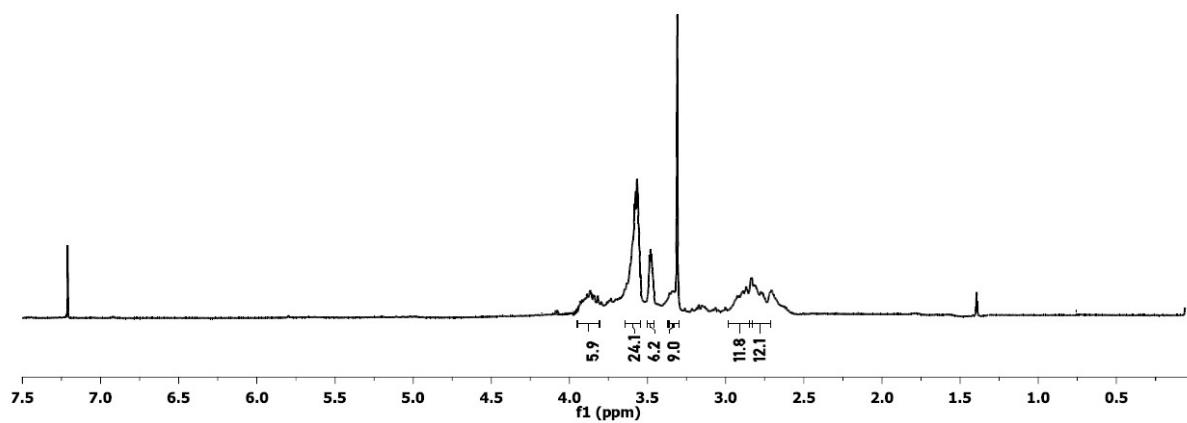

Fig S19. The <sup>1</sup>H NMR spectrum of compound 5

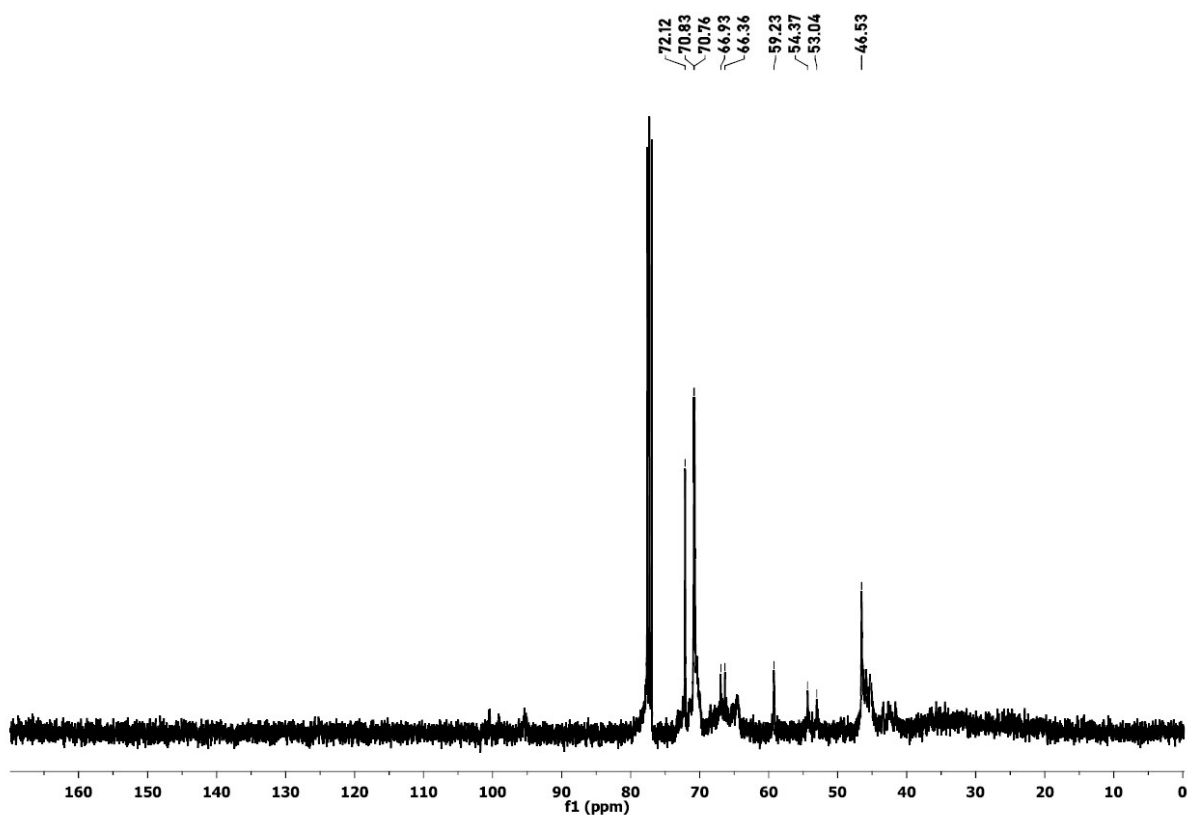

Fig S20. The <sup>13</sup>C NMR spectrum of compound 5

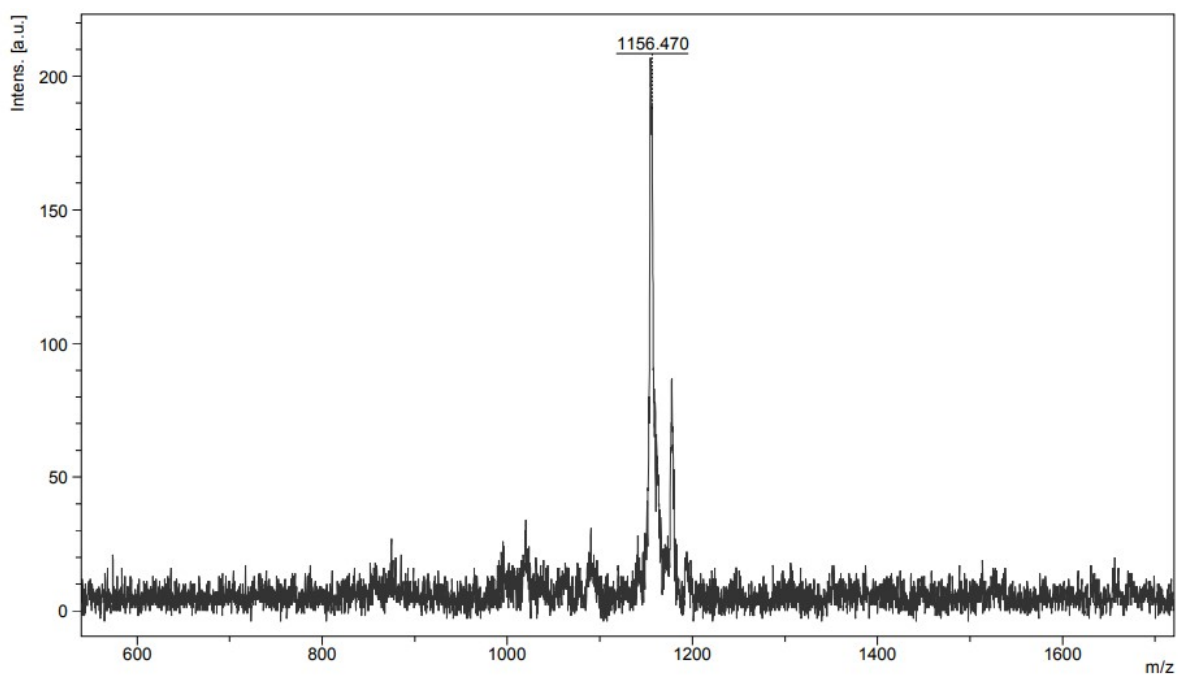

**Fig S21.** The MALDI TOF mass spectrum of compound **6**

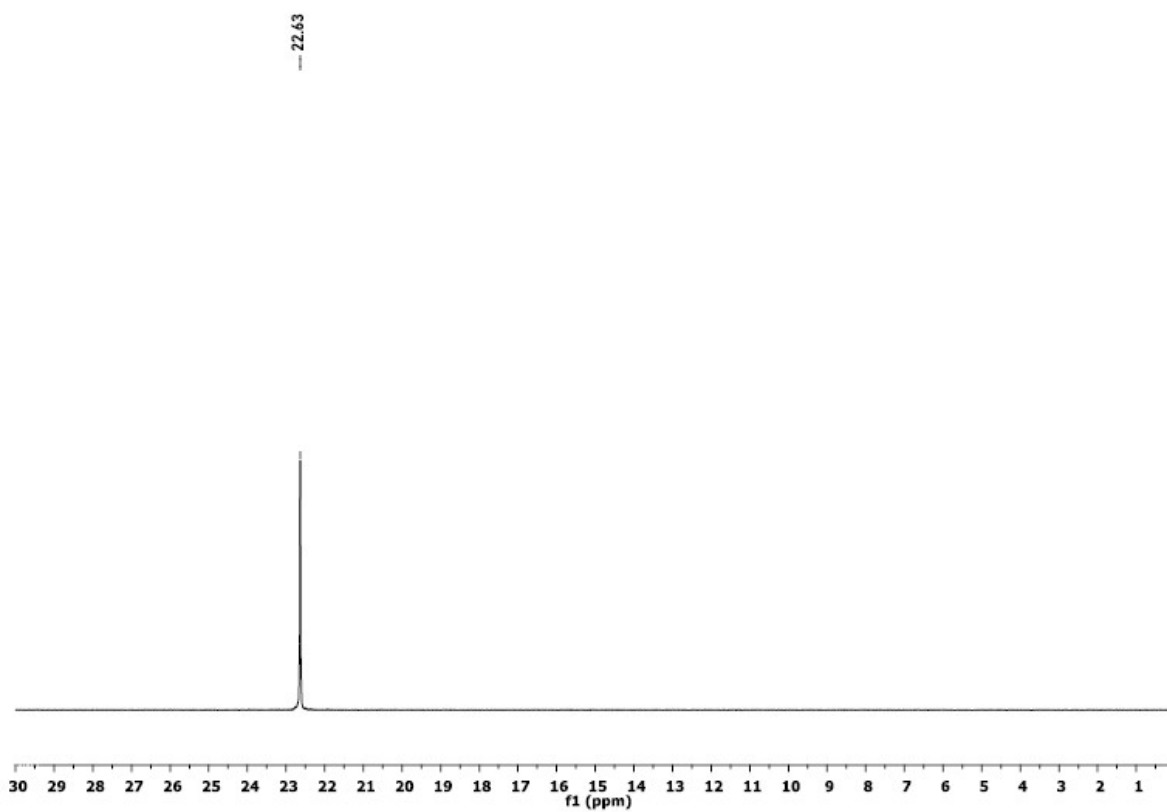

**Fig S22.** The proton decoupled  $^{31}\text{P}$  NMR spectrum of compound **6**

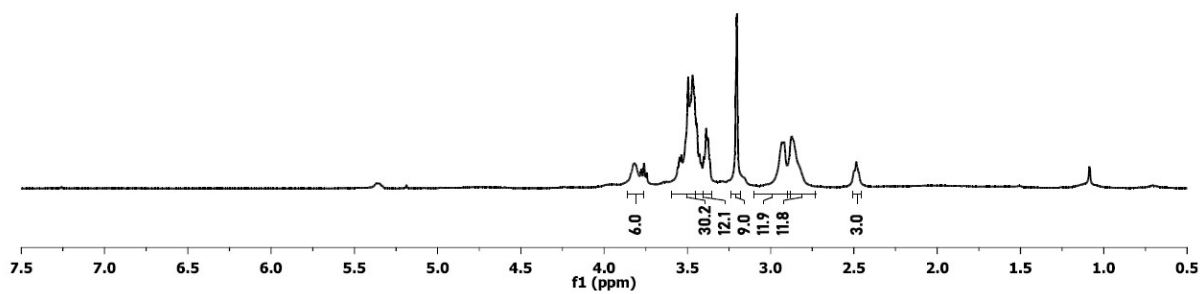

Fig S23. The <sup>1</sup>H NMR spectrum of compound 6

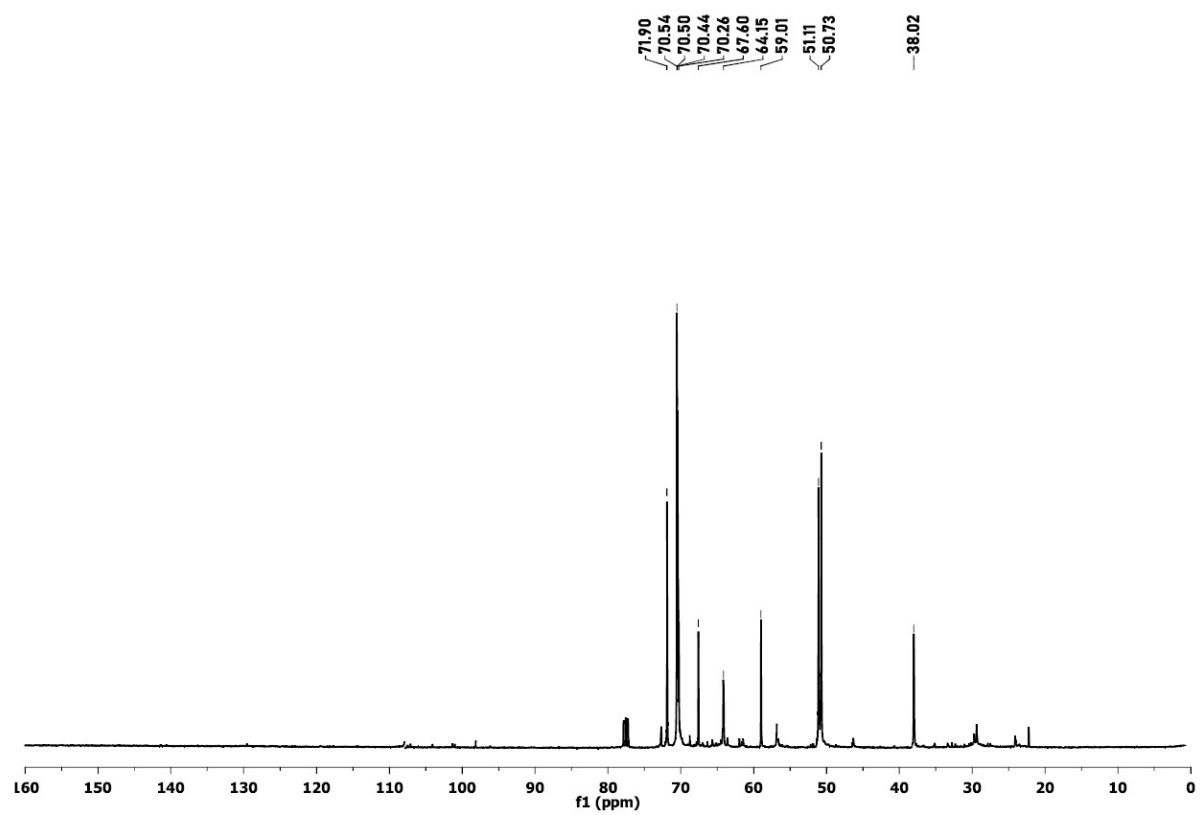

Fig S24. The <sup>13</sup>C NMR spectrum of compound 6

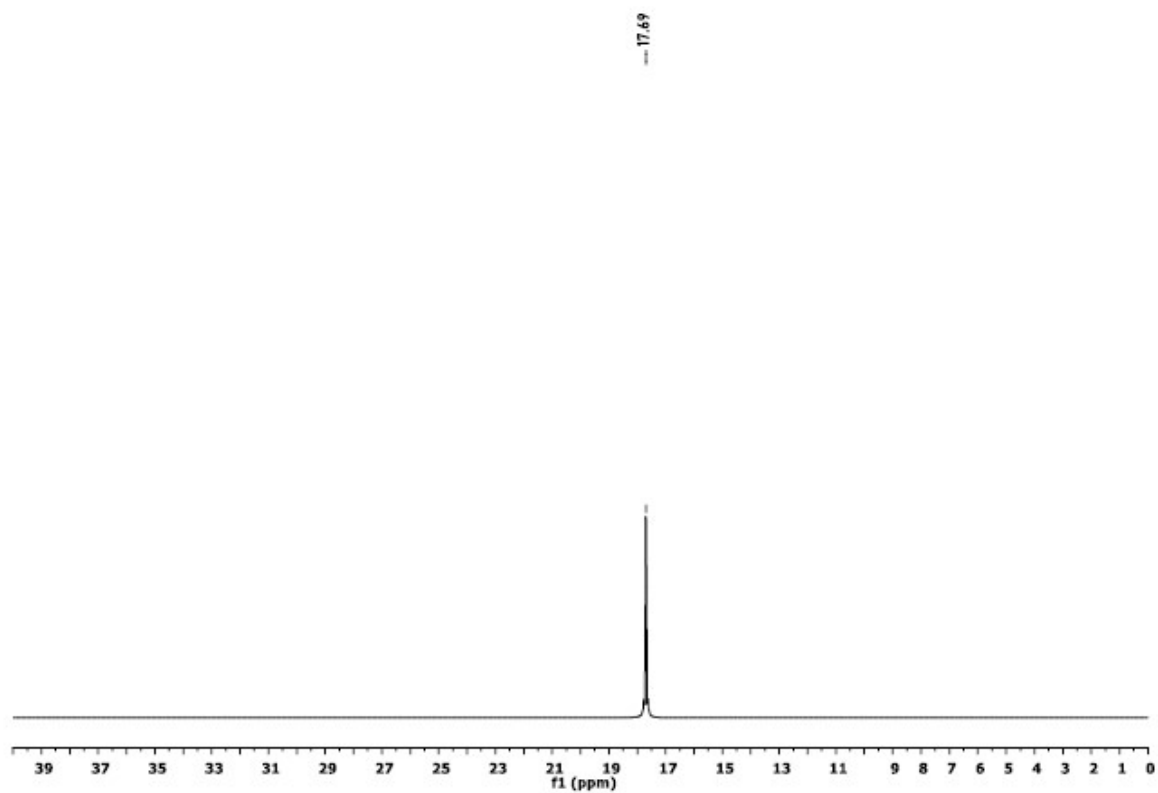

**Fig S25.** The proton decoupled  $^{31}\text{P}$  NMR spectrum of compound 7

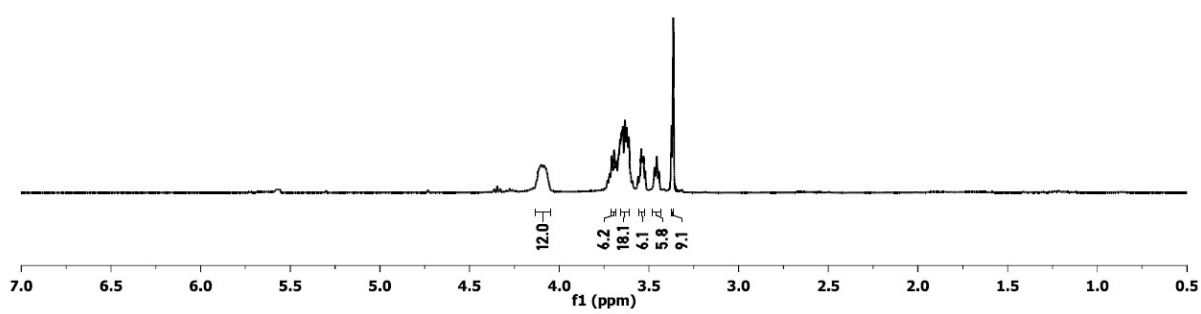

**Fig S26.** The  $^1\text{H}$  NMR spectrum of compound 7

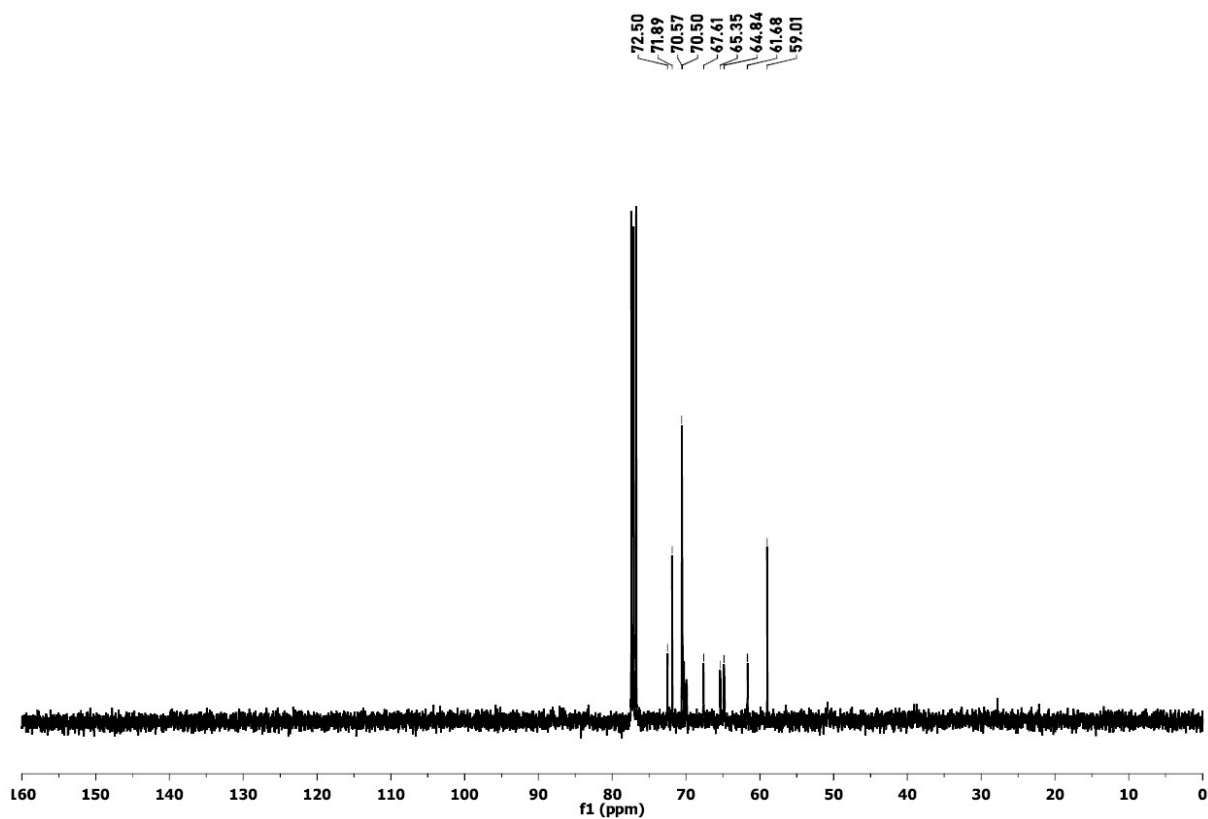

**Fig S27.** The <sup>13</sup>C NMR spectrum of compound **7**

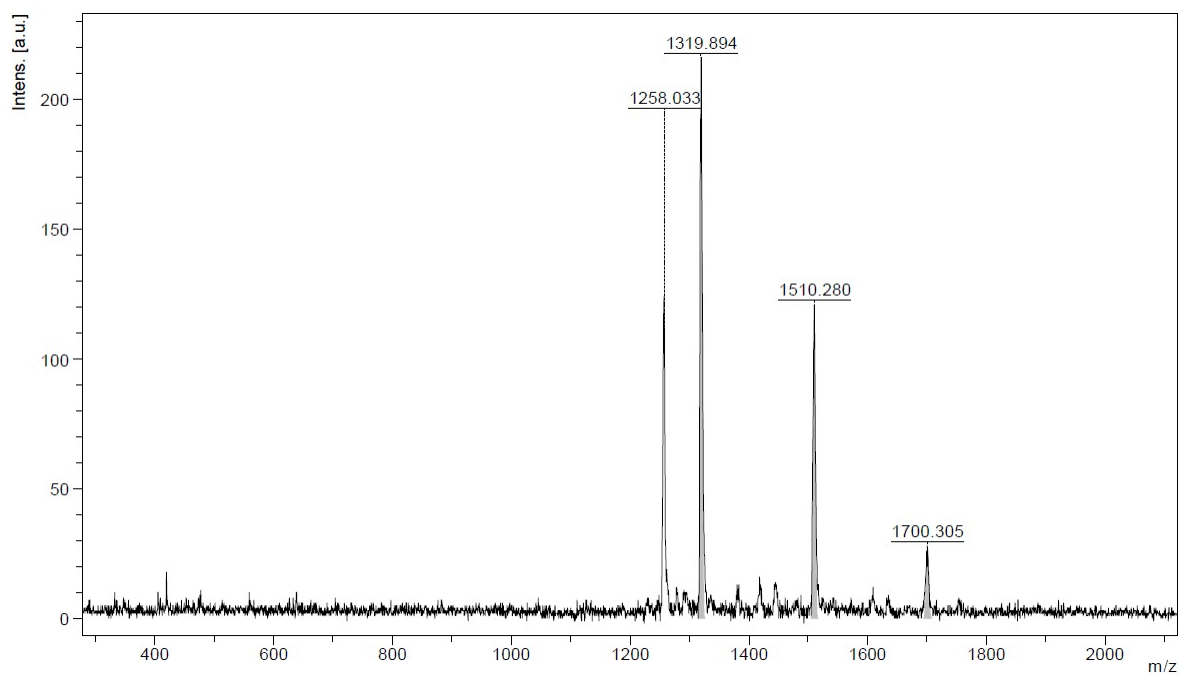

**Fig S28.** The MALDI TOF mass spectrum of compound **8**

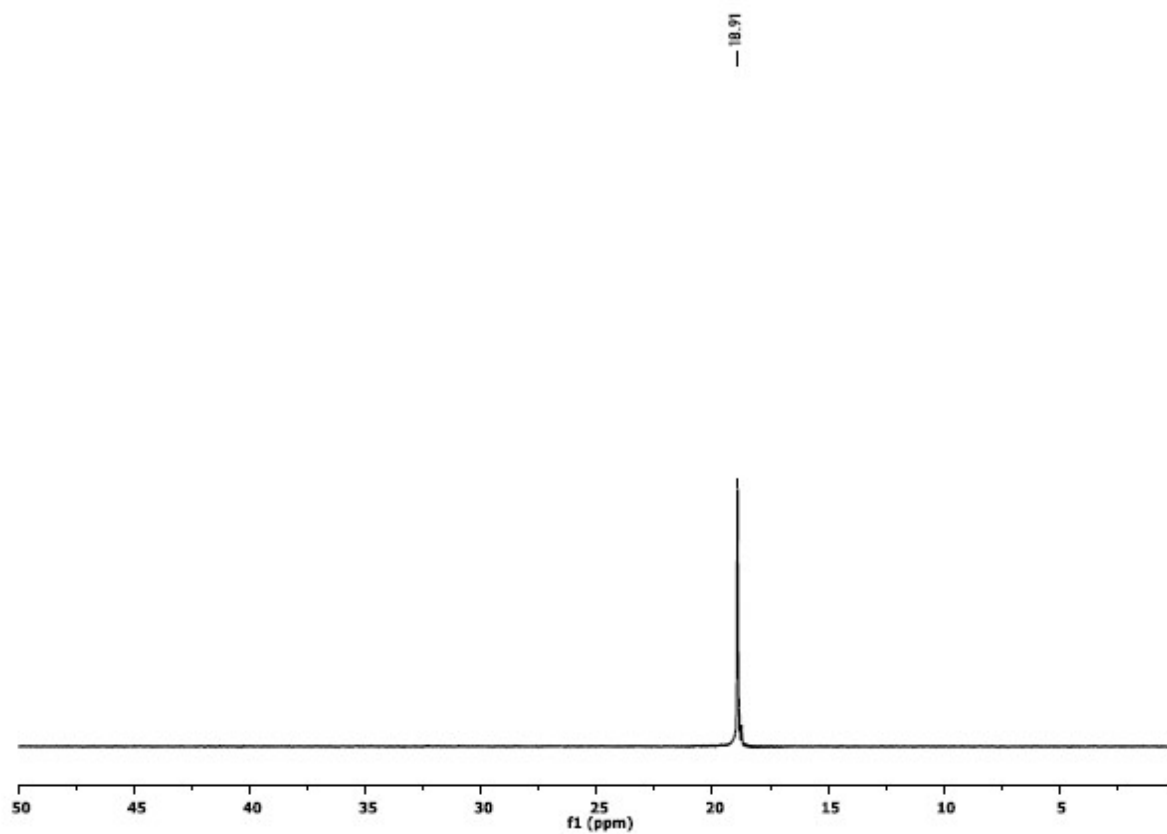

**Fig S29.** The proton decoupled  $^{31}\text{P}$  NMR spectrum of compound **8**

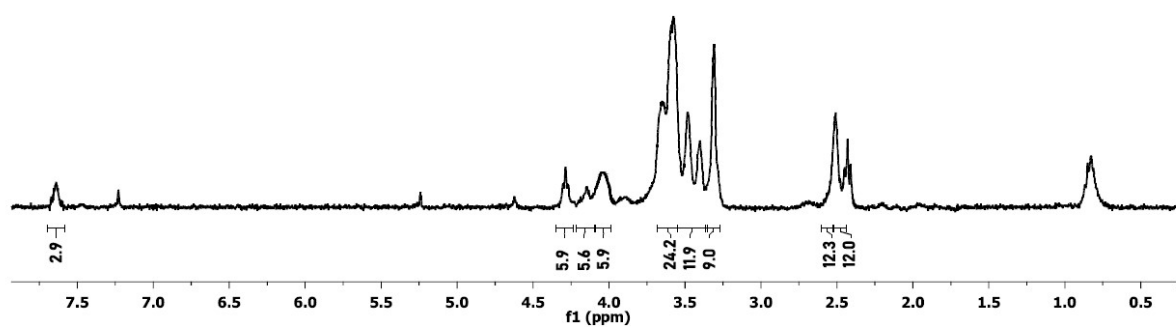

**Fig S30.** The  $^1\text{H}$  NMR spectrum of compound **8**



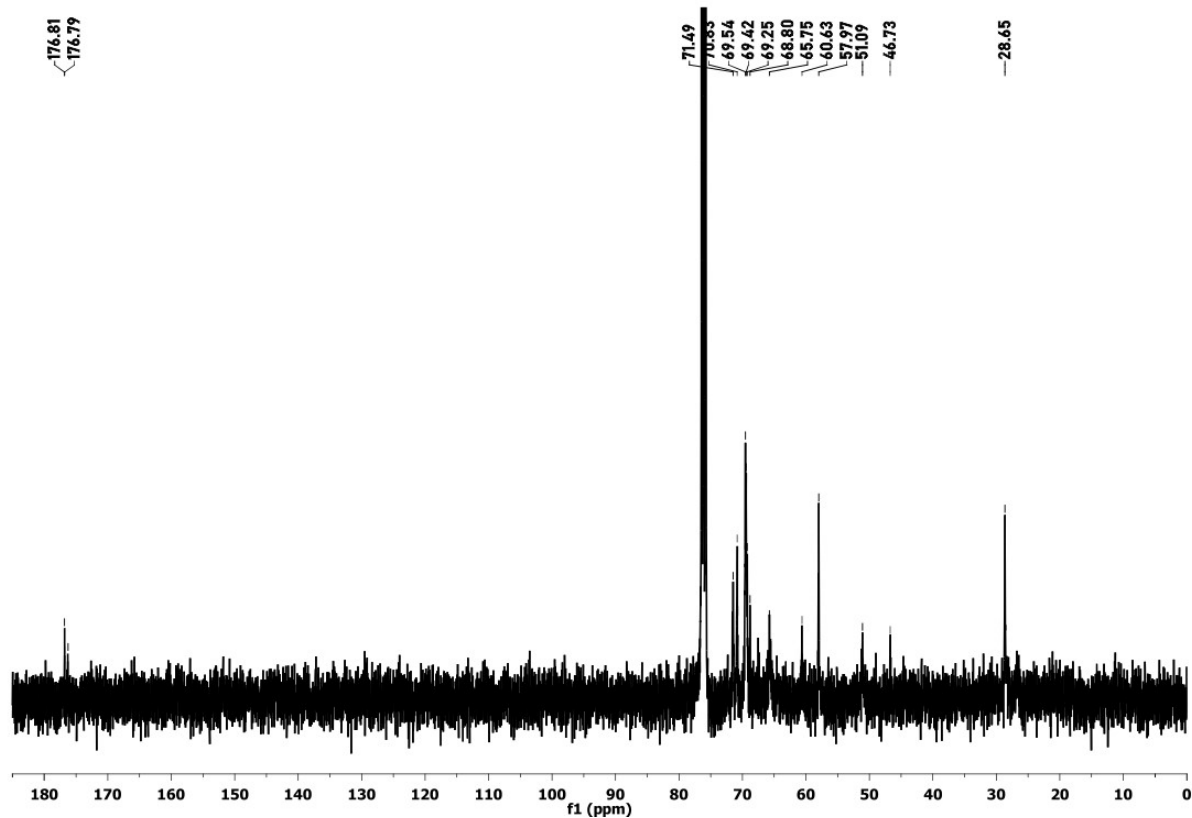

**Fig S31.** The  $^{13}\text{C}$  NMR spectrum of compound **8**

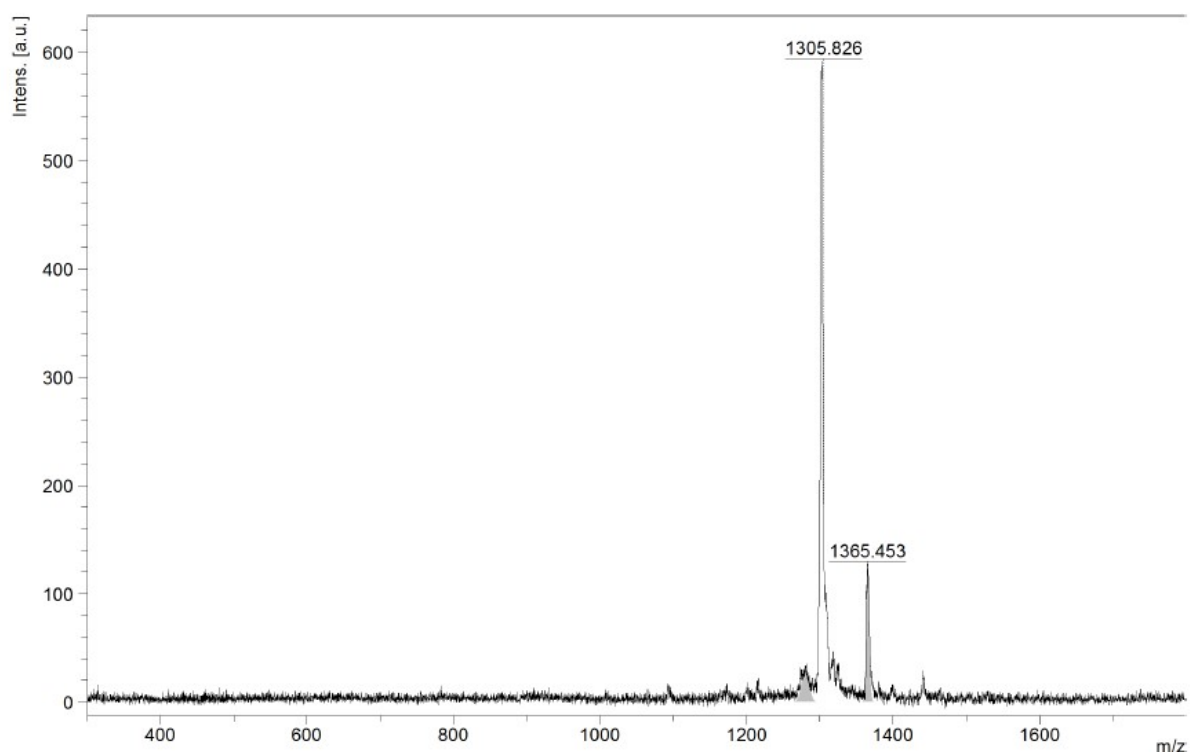

**Fig S32.** The MALDI TOF mass spectrum of compound **9**

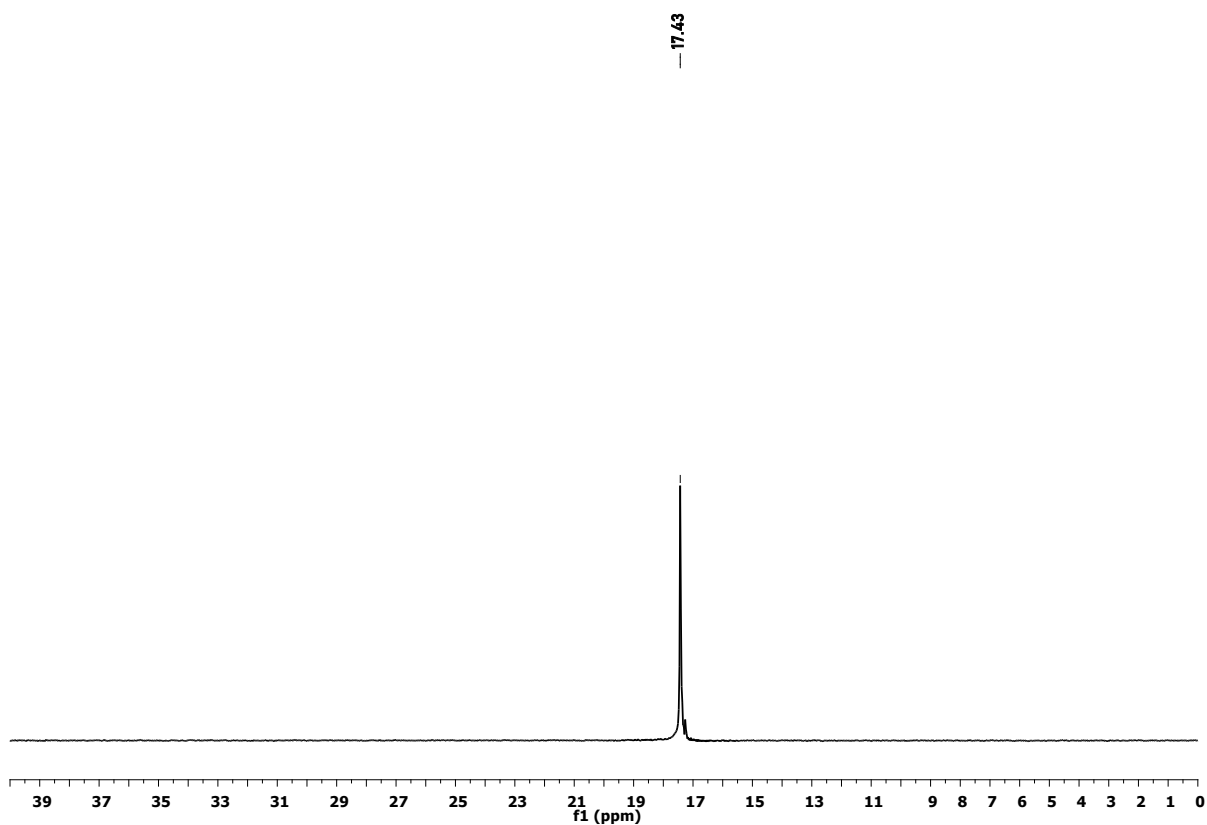

**Fig S33.** The proton decoupled  $^{31}\text{P}$  NMR spectrum of compound **9**

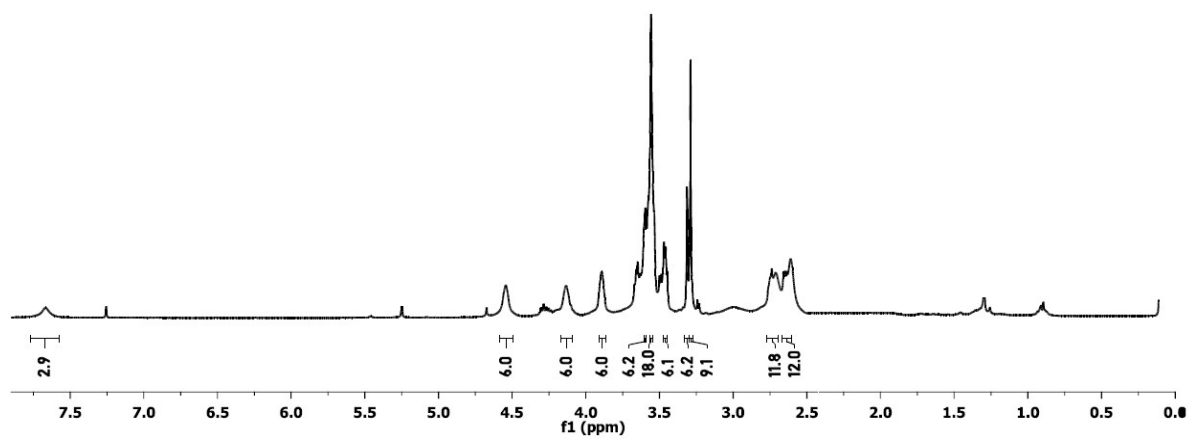

**Fig S34.** The  $^1\text{H}$  NMR spectrum of compound **9**

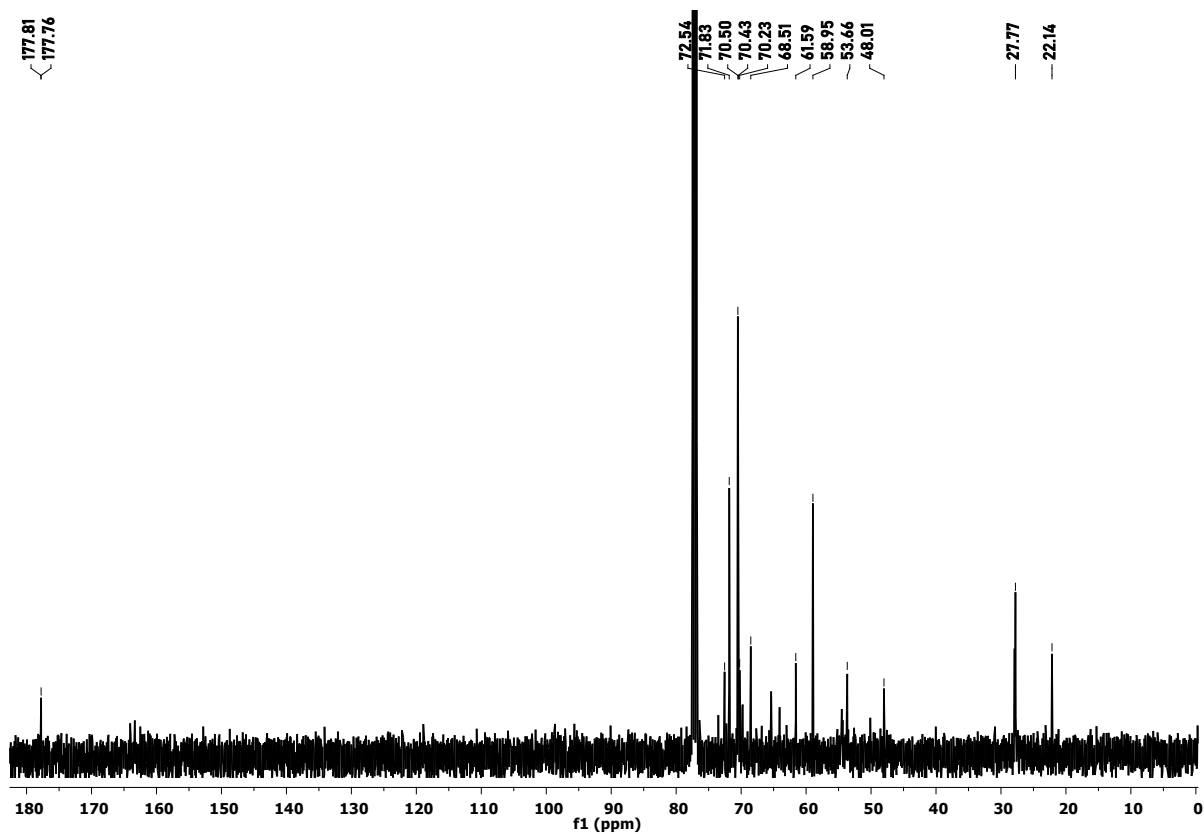

**Fig S35.** The  $^{13}\text{C}$  NMR spectrum of compound **9**

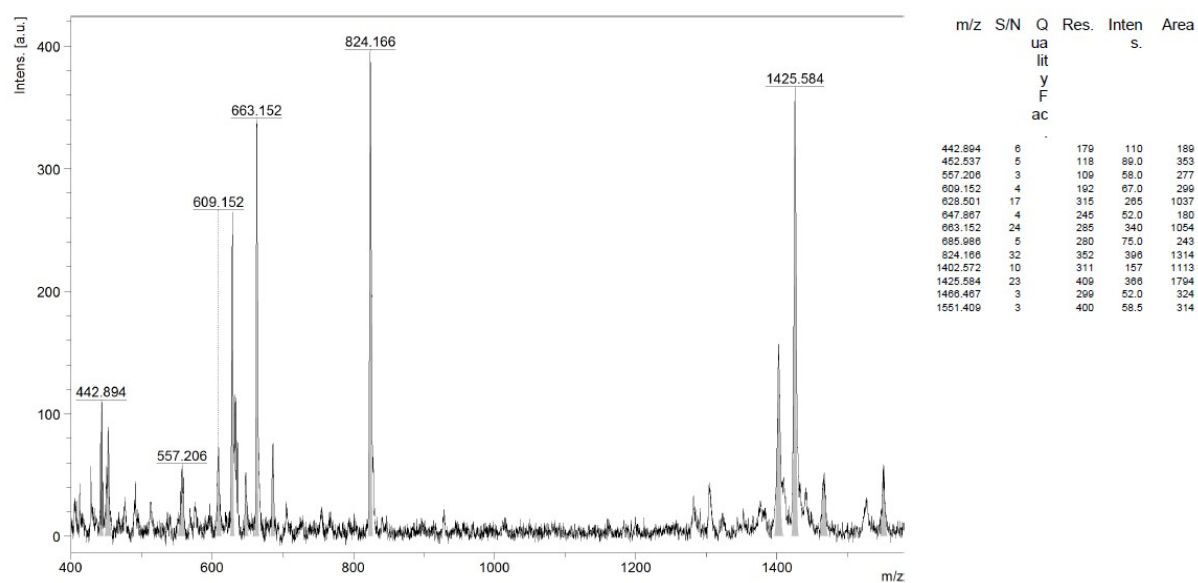

**Fig S36.** The MALDI TOF mass spectrum of compound **10**

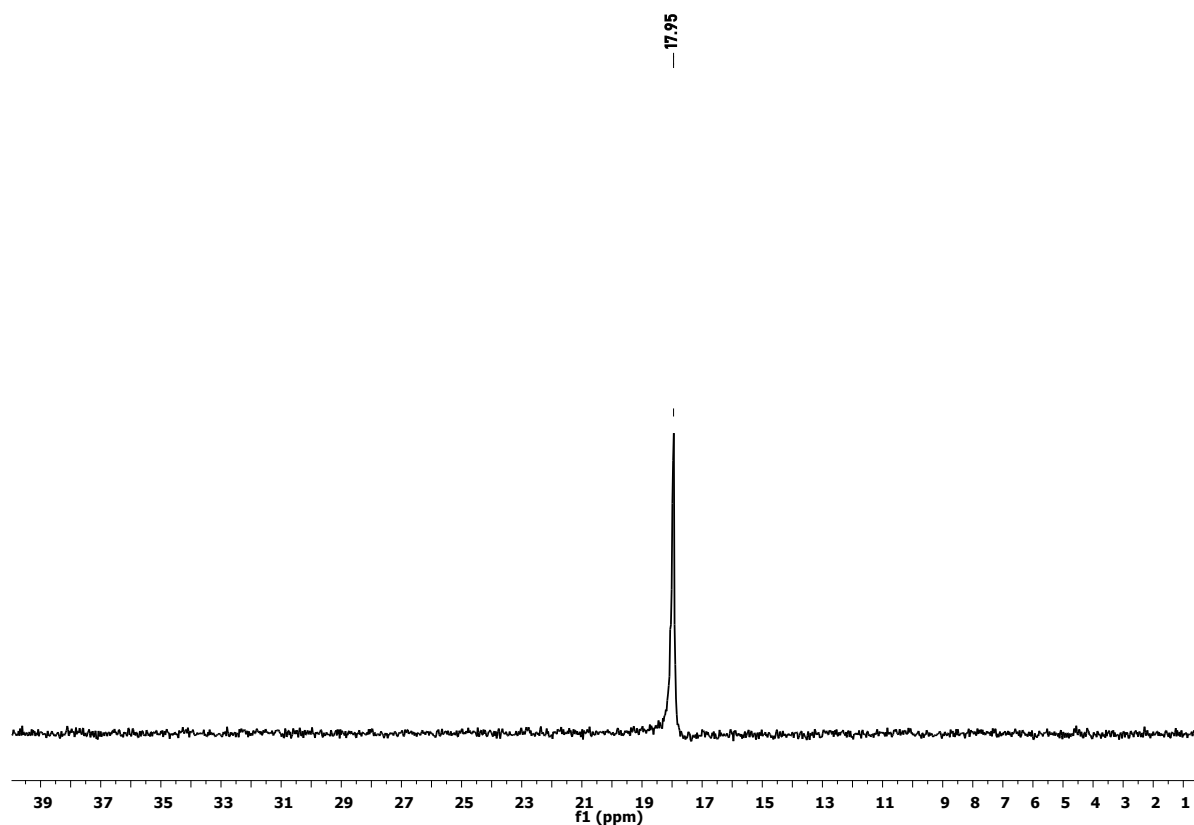

**Fig S37.** The proton decoupled  $^{31}\text{P}$  NMR spectrum of compound **10**

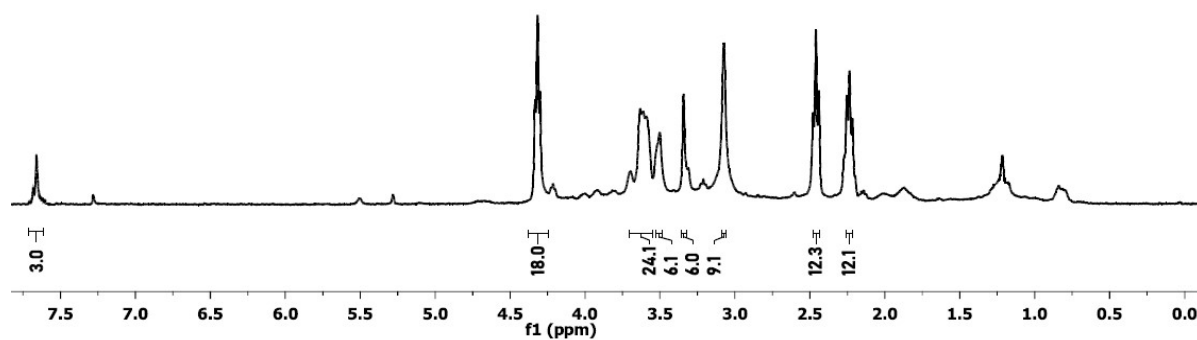

**Fig S38.** The  $^1\text{H}$  NMR spectrum of compound **10**

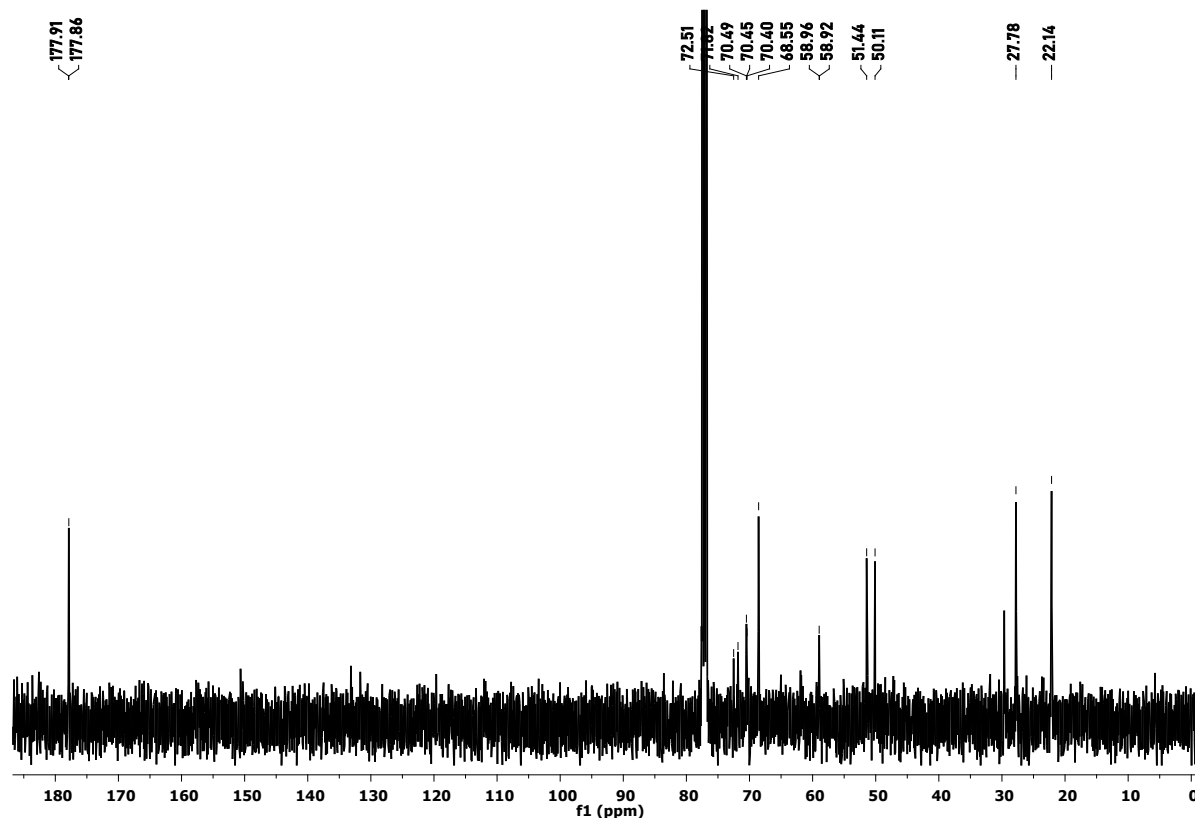

**Fig S39.** The  $^{13}\text{C}$  NMR spectrum of compound **10**

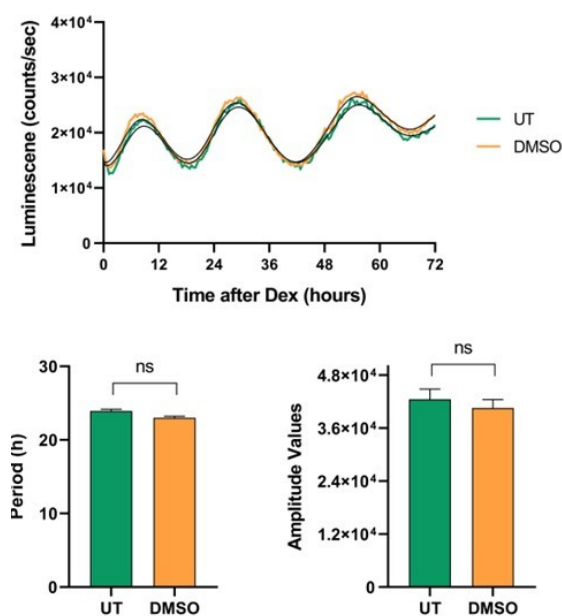

**Fig S40.** Real-time bioluminescence graph representing circadian oscillations in untreated (UT) and 0.5% DMSO treated U2OS cells. Graphs represented raw data were illustrated with GraphPad. Period and amplitude data were analyzed using Student's-t test, revealing no significant differences between groups. Period and amplitude values are represented mean  $\pm$  SD ( $n = 3$ ). Statistical significance was set at  $*p < 0.01$ .

**Table S1.** XLOGP values computed by SwissADME web server.

| <b>Compound</b> | <b>1</b> | <b>2</b> | <b>3</b> | <b>4</b> | <b>5</b> | <b>6</b> | <b>7</b> | <b>8</b> | <b>9</b> | <b>10</b> |
|-----------------|----------|----------|----------|----------|----------|----------|----------|----------|----------|-----------|
| <b>XLOGP</b>    | 1.75     | -1.03    | -0.59    | 5.39     | 1.36     | 0.84     | 4.77     | -2.56    | -1.39    | -5.21     |

**Table S2.** Colony Formation values.

| Compound No  | Replicates | Colony Numbers |          | Average  |          | Plating Efficiency |          | Plating Efficiency (%) |          | Plating Efficiency (%) Normalized to DMSO |          | Plating Efficiency Normalized to DMSO |          |
|--------------|------------|----------------|----------|----------|----------|--------------------|----------|------------------------|----------|-------------------------------------------|----------|---------------------------------------|----------|
|              |            | Min Dose       | Max Dose | Min Dose | Max Dose | Min Dose           | Max Dose | Min Dose               | Max Dose | Min Dose                                  | Max Dose | Min Dose                              | Max Dose |
| 1            | R1         | 165,00         | 152,00   | 179,33   | 162,33   | 0,36               | 0,32     | 35,87                  | 32,47    | 61,91                                     | 56,04    | 0,62                                  | 0,56     |
|              | R2         | 191,00         | 169,00   |          |          |                    |          |                        |          |                                           |          |                                       |          |
|              | R3         | 182,00         | 166,00   |          |          |                    |          |                        |          |                                           |          |                                       |          |
| 2            | R1         | 153,00         | 76,00    | 167,67   | 84,67    | 0,34               | 0,17     | 33,53                  | 16,93    | 57,88                                     | 29,23    | 0,58                                  | 0,29     |
|              | R2         | 195,00         | 92,00    |          |          |                    |          |                        |          |                                           |          |                                       |          |
|              | R3         | 155,00         | 86,00    |          |          |                    |          |                        |          |                                           |          |                                       |          |
| 3            | R1         | 189,00         | 150,00   | 182,67   | 152,00   | 0,37               | 0,30     | 36,53                  | 30,40    | 63,06                                     | 52,47    | 0,63                                  | 0,52     |
|              | R2         | 194,00         | 158,00   |          |          |                    |          |                        |          |                                           |          |                                       |          |
|              | R3         | 165,00         | 148,00   |          |          |                    |          |                        |          |                                           |          |                                       |          |
| 4            | R1         | 153,00         | 57,00    | 169,67   | 62,67    | 0,34               | 0,13     | 33,93                  | 12,53    | 58,57                                     | 21,63    | 0,59                                  | 0,22     |
|              | R2         | 180,00         | 68,00    |          |          |                    |          |                        |          |                                           |          |                                       |          |
|              | R3         | 176,00         | 63,00    |          |          |                    |          |                        |          |                                           |          |                                       |          |
| 5            | R1         | 176,00         | 107,00   | 163,67   | 114,33   | 0,33               | 0,23     | 32,73                  | 22,87    | 56,50                                     | 39,47    | 0,57                                  | 0,39     |
|              | R2         | 170,00         | 122,00   |          |          |                    |          |                        |          |                                           |          |                                       |          |
|              | R3         | 145,00         | 114,00   |          |          |                    |          |                        |          |                                           |          |                                       |          |
| 6            | R1         | 219,00         | 187,00   | 209,00   | 190,33   | 0,42               | 0,38     | 41,80                  | 38,07    | 72,15                                     | 65,71    | 0,72                                  | 0,66     |
|              | R2         | 216,00         | 195,00   |          |          |                    |          |                        |          |                                           |          |                                       |          |
|              | R3         | 192,00         | 189,00   |          |          |                    |          |                        |          |                                           |          |                                       |          |
| 7            | R1         | 190,00         | 127,00   | 196,67   | 129,33   | 0,39               | 0,26     | 39,33                  | 25,87    | 67,89                                     | 44,65    | 0,68                                  | 0,45     |
|              | R2         | 208,00         | 141,00   |          |          |                    |          |                        |          |                                           |          |                                       |          |
|              | R3         | 192,00         | 120,00   |          |          |                    |          |                        |          |                                           |          |                                       |          |
| 8            | R1         | 193,00         | 132,00   | 180,33   | 134,33   | 0,36               | 0,27     | 36,07                  | 26,87    | 62,26                                     | 46,38    | 0,62                                  | 0,46     |
|              | R2         | 175,00         | 135,00   |          |          |                    |          |                        |          |                                           |          |                                       |          |
|              | R3         | 173,00         | 136,00   |          |          |                    |          |                        |          |                                           |          |                                       |          |
| 9            | R1         | 215,00         | 161,00   | 207,67   | 173,33   | 0,42               | 0,35     | 41,53                  | 34,67    | 71,69                                     | 59,84    | 0,72                                  | 0,60     |
|              | R2         | 228,00         | 185,00   |          |          |                    |          |                        |          |                                           |          |                                       |          |
|              | R3         | 180,00         | 174,00   |          |          |                    |          |                        |          |                                           |          |                                       |          |
| 10           | R1         | 153,00         | 77,00    | 166,33   | 67,33    | 0,33               | 0,13     | 33,27                  | 13,47    | 57,42                                     | 23,25    | 0,57                                  | 0,23     |
|              | R2         | 185,00         | 75,00    |          |          |                    |          |                        |          |                                           |          |                                       |          |
|              | R3         | 161,00         | 50,00    |          |          |                    |          |                        |          |                                           |          |                                       |          |
| DMSO Control | R1         | 280,00         | 280,00   | 289,67   | 289,67   | 0,58               | 0,58     | 57,93                  | 57,93    | 100,00                                    | 100,00   | 1,00                                  | 1,00     |
|              | R2         | 291,00         | 291,00   |          |          |                    |          |                        |          |                                           |          |                                       |          |
|              | R3         | 298,00         | 298,00   |          |          |                    |          |                        |          |                                           |          |                                       |          |
